# 1 **Mutational cascade of SARS-CoV-2 leading to evolution and emergence of omicron** 2 **variant**

3 **Kanika Bansal<sup>1\*</sup>, Sanjeet Kumar<sup>2\*</sup>**

4 1 CSIR-Institute of Microbial Technology, Chandigarh, India

5 2 Gangadhar Meher University, Sambalpur, Odisha, India

6 \* Corresponding author

7 Address for correspondence:

8 [kanikabansal@imtech.res.in](mailto:kanikabansal@imtech.res.in) (K. Bansal); [ksanjeet.ibab@imtech.res.in](mailto:ksanjeet.ibab@imtech.res.in)

## 9 **Abstract**

10 **Background:** Emergence of new variant of SARS-CoV-2, namely omicron, has posed a  
11 global concern because of its high rate of transmissibility and mutations in its genome.  
12 Researchers worldwide are trying to understand the evolution and emergence of such variants  
13 to understand the mutational cascade events.

14 **Methods:** We have considered all omicron genomes (n = 302 genomes) available till 2<sup>nd</sup>  
15 December 2021 in the public repository of GISAID along with representatives of variants of  
16 concern (VOC), i.e., alpha, beta, gamma, delta, and omicron; variant of interest (VOI) mu  
17 and lambda; and variant under monitoring (VUM). Whole genome-based phylogeny and  
18 mutational analysis were performed to understand the evolution of SARS CoV-2 leading to  
19 emergence of omicron variant.

20 **Results:** Whole genome-based phylogeny depicted two phylogroups (PG-I and PG-II)  
21 forming variant specific clades except for gamma and VUM GH. Mutational analysis  
22 detected 18,261 mutations in the omicron variant, majority of which were non-synonymous  
23 mutations in spike (A67, T547K, D614G, H655Y, N679K, P681H, D796Y, N856K, Q954H),  
24 followed by RNA dependent RNA polymerase (rdrp) (A1892T, I189V, P314L, K38R, T492I,  
25 V57V), ORF6 (M19M) and nucleocapsid protein (RG203KR).

26 **Conclusion:** Delta and omicron have evolutionary diverged into distinct phylogroups and do  
27 not share a common ancestry. While, omicron shares common ancestry with VOI lambda and  
28 its evolution is mainly derived by the non-synonymous mutations.

## 29 **Abbreviations:**

30 VOC, variant of concern; VOI, variant of interest; VUM, variant under monitoring; NSP,  
31 non-structural protein; UTR, untranslated region; rdrp, RNA dependent RNA polymerase.

32 **Keywords:** SARS-CoV-2, COVID-19, genome-wide, evolution, deadly variants, VOC, VOI,  
33 VUM, SNP, mutation, non-synonymous, silent mutation, spike, RNA dependent RNA  
34 polymerase, NSP, UTR

## 35 **Introduction**

36 Currently, the world is witnessing a resurgence of COVID-19 cases due to the new omicron  
37 variant belonging to B.1.1.529. Omicron was first reported in South Africa on 24<sup>th</sup> November  
38 2021 from the specimen collected on 9<sup>th</sup> November  
39 2021([https://www.who.int/publications/m/item/enhancing-readiness-for-omicron-\(b.1.1.529\)-  
40 technical-brief-and-priority-actions-for-member-states](https://www.who.int/publications/m/item/enhancing-readiness-for-omicron-(b.1.1.529)-technical-brief-and-priority-actions-for-member-states)). On 26<sup>th</sup> November 2021, World  
41 Health Organisation (WHO) assigned omicron to the ‘variant of concern’ (VOC) category  
42 due to its ability to poses a higher risk of reinfection as compared to previously reported  
43 variants ([https://www.who.int/news/item/26-11-2021-classification-of-omicron-\(b.1.1.529\)-  
44 sars-cov-2-variant-of-concern](https://www.who.int/news/item/26-11-2021-classification-of-omicron-(b.1.1.529)-sars-cov-2-variant-of-concern); [https://www.who.int/news/item/28-11-2021-update-on-  
45 omicron](https://www.who.int/news/item/28-11-2021-update-on-omicron)). According to the 1<sup>st</sup> December 2021 update, omicron is reported in at least 23  
46 countries from five out of six WHO regions, with most cases in Africa and Europe  
47 ([https://www.cnbc.com/2021/12/01/who-says-omicron-has-been-found-in-23-countries-  
48 across-the-world.html](https://www.cnbc.com/2021/12/01/who-says-omicron-has-been-found-in-23-countries-across-the-world.html)).

49 There is a lot of uncertainty surrounding the omicron variant. For its risk assessment,  
50 scientists and researchers are investigating the intensity of its spread, extent of its infection,  
51 effectiveness of detection methods, therapeutics, and vaccine efficacy (Knoll & Wonodi,  
52 2021; Lipsitch & Dean, 2020; Pegu et al., 2021). The onset of omicron is reported with mild  
53 diseases suggests its low or mild severity than its previous counterparts like delta (Ewen  
54 Callaway, 2021; E. Callaway & Ledford, 2021). It is known to have a very high mutation rate  
55 with more than 30 mutational changes in its spike protein (Ewen Callaway, 2021)  
56 ([https://www.who.int/publications/m/item/enhancing-readiness-for-omicron-\(b.1.1.529\)-  
57 technical-brief-and-priority-actions-for-member-states](https://www.who.int/publications/m/item/enhancing-readiness-for-omicron-(b.1.1.529)-technical-brief-and-priority-actions-for-member-states))

58 Globally, high risk of reinfection with omicron variant, low vaccine and testing coverage are  
59 ideal for mutations resulting in the emergence of new variants of SARS-CoV-2 (Pulliam et

60 al., 2021). Since COVID-19 inception, researchers have been trying to investigate its origin  
61 and evolution (Bansal, Kumar, & Patil, 2021; Singh & Soojin, 2021; Tang et al., 2020). We  
62 are currently witnessing a global molecular arms race between SARS-CoV-2 and its  
63 preventive therapeutics based on diverse regimes such as DNA, RNA, protein or inactivated  
64 whole-virion, etc. (Andreadakis et al., 2020; Corey, Mascola, Fauci, & Collins, 2020;  
65 Sharma, Sultan, Ding, & Triggler, 2020). This global crisis can be addressed by a very rapid  
66 immunization program worldwide. Moreover, the real-time monitoring of evolutionary  
67 cascade of SARS-CoV-2 leading to lethal variants is utmost. Earlier investigation of several  
68 VOC and VOI suggests some of the crucial mutations for viral survival and high infectivity  
69 in humans (Boehm et al., 2021; Kumar & Bansal, 2021; Schmidt et al., 2021). However,  
70 mutations giving rise to omicron and intra-omicron genomic diversity are not yet analyzed at  
71 a population level.

72 In the present study, we aim to look for the mutational profile of deadly and under-  
73 monitoring variants reported till now to understand the emergence of a heavily mutated  
74 variant named omicron. Interestingly, whole genome-based phylogeny suggests two major  
75 phylogroups PG-I and PG-II. Further, mutational analysis depicted the key role of non-  
76 synonymous mutations in the evolution of lethal variants. Such genomic insights into the  
77 nature of mutational cascade are the need of the hour.

## 78 **Results**

### 79 **Phylogenomics suggests common ancestry of omicron and lambda variants**

80 Whole genome-based phylogeny (n = 478 genomes) representing VOC (alpha, beta, gamma,  
81 delta, and omicron), VOI (mu and lambda), VUM depicts two major phylogroups PG-I and  
82 PG-II (figure 1, supplementary figure 1 and supplementary table 1). Here, the reference strain  
83 of SARS-CoV-2 (Wuhan-Hu-1, NC\_045512.2) is taken as an outgroup. PG-I has VOC:  
84 gamma, beta, and delta; VOI: mu and VUM: GH. PG-II includes VOC: alpha, omicron and  
85 VOI: lambda. However, seven strains of VOC gamma are in PG-II, two of which are basal to  
86 PG-II forming its outgroup (EPI\_ISL\_3218258, EPI\_ISL\_2454057), and five  
87 (EPI\_ISL\_2220217, EPI\_ISL\_2216321, EPI\_ISL\_2223074, EPI\_ISL\_2224081, and  
88 EPI\_ISL\_2224090) are more related to alpha variant. EPI\_ISL\_3160245 one of the VUM  
89 strain is distant from the main clade of VUM.

90 Interestingly, two deadly VOCs, delta and omicron, belong to different phylogroups.  
91 Phylogeny depicted that omicron shares a common ancestry with VOI lambda represented by

92 a black asterisk in figure 1. Interestingly, three isolated from Italy (EPI\_ISL\_6854346,  
93 EPI\_ISL\_6854347, and EPI\_ISL\_6854348) form a diversified sub-lineage among the  
94 omicron population. Additionally, EPI\_ISL\_6886594 from Germany is a diversified omicron  
95 strain.

### 96 **Very high non-synonymous mutations give rise to omicron**

97 To further understand the evolution and emergence of omicron, we have performed a  
98 mutational analysis with respect to the reference genome of SARS-CoV-2 (NC\_045512.2)  
99 (figure 2). Total mutations detected in the dataset were 24,189, and omicron genomes  
100 constituted 18,261 (supplementary table 2). Interestingly, >97% (n = 17,703 mutations) of the  
101 mutations in omicron were in the coding region, and remaining 558 were detected in the  
102 extragenic region of the genome. Amongst the coding gene mutations, 2,965 were indels  
103 while 14,738 were SNPs constituting non-synonymous (n = 11,995 mutations) and  
104 synonymous mutations (n = 2,743 mutations).

105 Interestingly, mutational events are highly skewed towards the spike protein, which  
106 constitutes ~60% (n = 10,658) of the total mutations in the coding genomic region (n =  
107 17,703) (figure 3). The majority of spike protein mutations encompass A67, T547K, D614G,  
108 H655Y, N679K, P681H, D796Y, N856K, Q954H, which are reported in all the omicron  
109 genomes analyzed (table 3). Count of mutations in the spike was followed by RNA  
110 dependent RNA polymerase (rdp) (n = 4,142) constituting A1892T, I189V, P314L, K38R,  
111 T492I, V57V in all omicron genomes analyzed (figure 3 and table 3). Remaining 2903  
112 mutations were detected in rest of the coding genomic region (table 2, 3, and supplementary  
113 table 1), where M19M in ORF6, and RG203KR in nucleocapsid protein are amongst the most  
114 prevalent mutations in omicron (figure 3).

### 115 **Low intra-sequence diversity amongst omicron variant**

116 Intra-strain diversity among the omicron variant strains reported worldwide will be crucial in  
117 understanding the genome dynamics and rapid evolution of SARS-JCoV-2. We performed  
118 the mutational analysis on the current dataset using omicron (OL677199) isolated from  
119 Canada on 23<sup>rd</sup> November 2021 as the reference genome. Most of the strains (n = 298),  
120 irrespective of their geographic origin, had less than ten mutations depicting low intra-strain  
121 diversity among omicron strains. However, four of the isolates two from Europe (Italy)  
122 (EPI\_ISL\_6854347 (n = 23 mutations) and EPI\_ISL\_6854346 (n = 14 mutations) and two  
123 from South Africa (EPI\_ISL\_6699742 (n = 12 mutations) and EPI\_ISL\_6774091 (n = 11

124 mutations) were most diversified among the omicron genomes. While omicron had >55  
125 mutations when compared with other VOCs and VOIs.

## 126 **Methods**

### 127 **Identification and procurement of SARS-CoV-2 genome from the public repository**

128 We have considered all the available genomes of omicron variant available in public domain  
129 until 6 pm Indian Standard Time (IST) on 2<sup>nd</sup> December 2021 from GISAID (n = 302  
130 genomes). A total of 25 strains from each variant of concern, namely alpha (B.1.1.7), beta  
131 (B.1.351), gamma (P.1) and delta (B.1.617.2) and variant of interest, namely lambda (C.37)  
132 and mu (B.1.621). We have also considered 25 strains from variant under monitoring, namely  
133 GH (B.1.640). These all strains are from their respective earlier reports in the public domain.  
134 A detailed list of all the strains used in the study is provided in the supplementary information  
135 (supplementary table 1).

### 136 **Phylogenetic analysis**

137 A total of 477 high-quality genomes, including the major variants spread across the globe  
138 were taken into consideration. Multiple sequence alignment was performed for all the  
139 genomes using MAFFT v7.467 (Nakamura, Yamada, Tomii, & Katoh, 2018) followed by  
140 phylogenetic tree construction using fasttree v2.1.8 with double precision (Price, Dehal, &  
141 Arkin, 2010) with gamma time reversal method. Visualization of the obtained phylogenetic  
142 tree was performed using iTol v6 (Letunic & Bork, 2019). Different variants were marked in  
143 accordance with different colors as mentioned in the legends.

### 144 **Mutational analysis**

145 Mutational analysis of all the strains (n=477) in the study was performed with two different  
146 reference genomes. First with NC\_045512.2 (Wuhan-Hu-1) strain (reference SARS CoV-2  
147 strain) and another with first reported strain of omicron variant (OL677199.1)  
148 (<https://www.ncbi.nlm.nih.gov/nuccore/OL677199>) using nucmer v3.1 (Delcher, Phillippy,  
149 Carlton, & Salzberg, 2002). We have used a well-documented R script described earlier  
150 (Mercatelli & Giorgi, 2020). Here, we have used gff3 annotation and reference genome file to  
151 extract genomic coordinate of SARS-CoV-2 proteins. R library package seqinr ([https://cran.r-](https://cran.r-project.org/web/packages/seqinr/index.html)  
152 [project.org/web/packages/seqinr/index.html](https://cran.r-project.org/web/packages/seqinr/index.html)) and biostring package  
153 (<https://bioconductor.org/packages/release/bioc/html/Biostrings.html>) of bioconductor was  
154 implemented to obtain the list of all the mutational events. Frequency and rate of mutation  
155 were calculated with respect to two different references (Reference SARS CoV-2 strain:

156 NC\_045512.2) ([https://www.ncbi.nlm.nih.gov/nuccore/NC\\_045512.2](https://www.ncbi.nlm.nih.gov/nuccore/NC_045512.2)) and omicron  
157 (OL677199.1) (<https://www.ncbi.nlm.nih.gov/nuccore/OL677199>) separately.

## 158 **Funding Information**

159 Nil

## 160 **Author contribution statement**

161 Kanika Bansal performed data curation, analysis and writing of manuscript with inputs from  
162 Sanjeet Kumar.

## 163 **Declaration of Competing Interest**

164 The author declares no competing interest.

## 165 **Acknowledgement**

166 Authors acknowledge the support and motivation from Dr. Prabhu B.Patil – CSIR-Institute of  
167 Microbial Technology, Chandigarh. We are also thankful to Dr. Santosh Kumar Sethi for his  
168 kind support during the process of study. We also acknowledge GISAID initiative for  
169 extensive curation and availability of genomic resource in public domain.

## 170 **References**

- 171 Andreadakis, Z., Kumar, A., Román, R. G., Tollefsen, S., Saville, M., & Mayhew, S. (2020). The COVID-  
172 19 vaccine development landscape. *Nature reviews. Drug discovery*, 19(5), 305-306.
- 173 Bansal, K., Kumar, S., & Patil, P. B. (2021). Codon usage pattern reveals SARS-CoV-2 as a  
174 monomorphic pathogen of hybrid origin with role of silent mutations in rapid evolutionary  
175 success. *bioRxiv*, 2020.2010.2012.335521. doi:10.1101/2020.10.12.335521
- 176 Boehm, E., Kronig, I., Neher, R. A., Eckerle, I., Vetter, P., & Kaiser, L. (2021). Novel SARS-CoV-2  
177 variants: the pandemics within the pandemic. *Clinical Microbiology and Infection*.
- 178 Callaway, E. (2021). Heavily mutated coronavirus variant puts scientists on alert. *Nature*.
- 179 Callaway, E., & Ledford, H. (2021). How bad is Omicron? What scientists know so far. *Nature*.  
180 doi:10.1038/d41586-021-03614-z
- 181 Corey, L., Mascola, J. R., Fauci, A. S., & Collins, F. S. (2020). A strategic approach to COVID-19 vaccine  
182 R&D. *Science*, 368(6494), 948-950.
- 183 Delcher, A. L., Phillippy, A., Carlton, J., & Salzberg, S. L. (2002). Fast algorithms for large-scale  
184 genome alignment and comparison. *Nucleic acids research*, 30(11), 2478-2483.
- 185 Knoll, M. D., & Wonodi, C. (2021). Oxford–AstraZeneca COVID-19 vaccine efficacy. *The Lancet*,  
186 397(10269), 72-74.
- 187 Kumar, S., & Bansal, K. J. V. r. (2021). Cross-sectional genomic perspective of epidemic waves of  
188 SARS-CoV-2: a pan India study. 198642.
- 189 Letunic, I., & Bork, P. (2019). Interactive Tree Of Life (iTOL) v4: recent updates and new  
190 developments. *Nucleic acids research*, 47(W1), W256-W259.
- 191 Lipsitch, M., & Dean, N. E. (2020). Understanding COVID-19 vaccine efficacy. *Science*, 370(6518), 763-  
192 765.
- 193 Mercatelli, D., & Giorgi, F. M. (2020). Geographic and genomic distribution of SARS-CoV-2 mutations.  
194 *Frontiers in microbiology*, 11, 1800.

- 195 Nakamura, T., Yamada, K. D., Tomii, K., & Katoh, K. (2018). Parallelization of MAFFT for large-scale  
196 multiple sequence alignments. *Bioinformatics*, *34*(14), 2490-2492.
- 197 Pegu, A., O'Connell, S. E., Schmidt, S. D., O'Dell, S., Talana, C. A., Lai, L., . . . Corbett, K. S. (2021).  
198 Durability of mRNA-1273 vaccine-induced antibodies against SARS-CoV-2 variants. *Science*,  
199 *373*(6561), 1372-1377.
- 200 Price, M. N., Dehal, P. S., & Arkin, A. P. (2010). FastTree 2—approximately maximum-likelihood trees  
201 for large alignments. *PLoS one*, *5*(3), e9490.
- 202 Pulliam, J. R. C., van Schalkwyk, C., Govender, N., von Gottberg, A., Cohen, C., Groome, M. J., . . .  
203 Moultrie, H. (2021). Increased risk of SARS-CoV-2 reinfection associated with emergence of  
204 the Omicron variant in South Africa. 2021.2011.2011.21266068.  
205 doi:10.1101/2021.11.11.21266068 %J medRxiv
- 206 Schmidt, M., Arshad, M., Bernhart, S. H., Hakobyan, S., Arakelyan, A., Loeffler-Wirth, H., & Binder, H.  
207 (2021). The evolving faces of the SARS-CoV-2 genome. *Viruses*, *13*(9), 1764.
- 208 Sharma, O., Sultan, A. A., Ding, H., & Triggie, C. R. (2020). A Review of the Progress and Challenges of  
209 Developing a Vaccine for COVID-19. *Frontiers in immunology*, *11*, 2413.
- 210 Singh, D., & Soojin, V. Y. (2021). On the origin and evolution of SARS-CoV-2. *Experimental &*  
211 *Molecular Medicine*, *53*(4), 537-547.
- 212 Tang, X., Wu, C., Li, X., Song, Y., Yao, X., Wu, X., . . . Qian, Z. (2020). On the origin and continuing  
213 evolution of SARS-CoV-2. *National Science Review*, *7*(6), 1012-1023.

214

## 215 **Figure and table legends:**

216 **Figure 1: Maximum likelihood whole genome-based phylogeny of SARS-CoV-2 VOCs,**  
217 **VOIs and VUMs.** Here, phylogroups (PG-I and PG-II) and clades (alpha, beta, gamma,  
218 delta, omicron, mu etc.) are marked with respective colors as indicated. Bootstrap values are  
219 represented by the radius of circle at the nodes. Common ancestry of omicron and lambda is  
220 marked by black star.

221 **Figure 2: Mutational analysis of omicron.** Six panel image displays the most mutated  
222 samples, overall mutations per samples, most frequent events per class of mutation category,  
223 changes of nucleotide per type, nucleotide wise most frequent events and protein level most  
224 frequent events for the genomes used in the study.

225 **Figure 3: Mutational analysis of omicron (A)** Number of mutations in the coding region is  
226 in the centre of the pie-chart representing indels (black), synonymous (yellow) and non-  
227 synonymous (red) SNPs. Type and number of mutations in the intergenic region is  
228 represented by pie charts blue, light blue and white as represented in the color legends. **(B)**  
229 Bar graph representing number of mutations in the genomic region of SARS-CoV-2. **(C)**  
230 Some of the top mutations (pl. refer table 3 for all top mutations in omicron) among the  
231 omicron variant are represented by stars of black: indels, yellow: synonymous and red: non-  
232 synonymous mutations.

233 **Table 1:** Metadata of the VOCs, VOIs and VUMs strains used in the present study.

234 **Table 2:** Genomic region wise mutational count of the omicron isolates by taking  
235 NC\_045512.2 as a reference.

236 **Table 3:** Top mutations (>185 in count) in omicron variant as compared to the reference  
237 sequence NC\_045512.2

238 **Supplementary material:**

239 **Supplementary figure 1: Maximum likelihood whole genome-based phylogeny of SARS-**  
240 **CoV-2 VOCs, VOIs and VUMs.** Here, phylogroups (PG-I and PG-II) and clades (alpha,  
241 beta, gamma, delta, omicron, mu etc.) are marked with respective colors as indicated.  
242 Bootstrap values are represented by the radius of circle at the nodes. For better visualisation  
243 of tree topology and bootstrap values branch length is ignored.

244 **Supplementary table 1:** Total mutations in strains under study using NC\_045512.2 as  
245 reference genome.

246 **Supplementary table 2:** Total mutations in strains under study using omicron (OL677199)  
247 as reference genome.













|         |                                           |            |           |                             |           |                        |        |       |       |         |         |           |     |                                                                              |            |
|---------|-------------------------------------------|------------|-----------|-----------------------------|-----------|------------------------|--------|-------|-------|---------|---------|-----------|-----|------------------------------------------------------------------------------|------------|
| Omicron | hCoV-19/G VOC_Omic betacoron: EPI_ISL_69  | 28-11-2021 | Europe    | Germany Hesse               | Europe    | Germany Hesse          | genome | 29747 | Human | 38      | Male    | B.1.1.529 | GR  | Institute for Institute for Toptan T., <a href="https://www">https://www</a> | 2-12-2021  |
| Omicron | hCoV-19/S VOC_Omic betacoron: EPI_ISL_69  | 24-11-2021 | Asia      | South Korea                 | Asia      | South Korea            | genome | 29872 | Human | 56      | Female  | B.1.1.529 | GR  | Division of Division of Ae Kyung F <a href="https://www">https://www</a>     | 2-12-2021  |
| Omicron | hCoV-19/S VOC_Omic betacoron: EPI_ISL_69  | 25-11-2021 | Asia      | South Korea                 | Asia      | South Korea            | genome | 29869 | Human | 46      | Female  | B.1.1.529 | GR  | Division of Division of Ae Kyung F <a href="https://www">https://www</a>     | 2-12-2021  |
| Omicron | hCoV-19/S VOC_Omic betacoron: EPI_ISL_69  | 29-11-2021 | Asia      | South Korea                 | Asia      | South Korea            | genome | 29862 | Human | 38      | Male    | B.1.1.529 | GR  | Division of Division of Ae Kyung F <a href="https://www">https://www</a>     | 2-12-2021  |
| Alpha   | hCoV-19/E VOC_Alpha betacoron: EPI_ISL_67 | 2020       | Europe    | United Kinj England         | Europe    | United Kinj England    | genome | 29763 | Human | unknown | unknown | B.1.1.7   | GRY | Centre for COVID-19 (Angela Bec <a href="https://www">https://www</a>        | 7-12-2020  |
| Alpha   | hCoV-19/E VOC_Alpha betacoron: EPI_ISL_70 | 2020       | Europe    | United Kinj England         | Europe    | United Kinj England    | genome | 29763 | Human | unknown | unknown | B.1.1.7   | GRY | Centre for COVID-19 (Angela Bec <a href="https://www">https://www</a>        | 14-12-2020 |
| Alpha   | hCoV-19/E VOC_Alpha betacoron: EPI_ISL_70 | 2020       | Europe    | United Kinj England         | Europe    | United Kinj England    | genome | 29763 | Human | unknown | unknown | B.1.1.7   | GRY | Centre for COVID-19 (Angela Bec <a href="https://www">https://www</a>        | 14-12-2020 |
| Alpha   | hCoV-19/E VOC_Alpha betacoron: EPI_ISL_70 | 2020       | Europe    | United Kinj England         | Europe    | United Kinj England    | genome | 29763 | Human | unknown | unknown | B.1.1.7   | GRY | Department COVID-19 (Aminu S. J. <a href="https://www">https://www</a>       | 14-12-2020 |
| Alpha   | hCoV-19/E VOC_Alpha betacoron: EPI_ISL_70 | 2020       | Europe    | United Kinj England         | Europe    | United Kinj England    | genome | 29763 | Human | unknown | unknown | B.1.1.7   | GRY | Department COVID-19 (Aminu S. J. <a href="https://www">https://www</a>       | 14-12-2020 |
| Alpha   | hCoV-19/E VOC_Alpha betacoron: EPI_ISL_70 | 2020       | Europe    | United Kinj England         | Europe    | United Kinj England    | genome | 29763 | Human | unknown | unknown | B.1.1.7   | GRY | Centre for COVID-19 (Angela Bec <a href="https://www">https://www</a>        | 14-12-2020 |
| Alpha   | hCoV-19/E VOC_Alpha betacoron: EPI_ISL_71 | 2020       | Europe    | United Kinj England         | Europe    | United Kinj England    | genome | 29861 | Human | unknown | unknown | B.1.1.7   | GRY | Respiraton COVID-19 (PHE Covid <a href="https://www">https://www</a>         | 18-12-2020 |
| Alpha   | hCoV-19/E VOC_Alpha betacoron: EPI_ISL_72 | 2020       | Europe    | United Kinj England         | Europe    | United Kinj England    | genome | 29763 | Human | unknown | unknown | B.1.1.7   | GRY | Centre for COVID-19 (Angela Bec <a href="https://www">https://www</a>        | 22-12-2020 |
| Alpha   | hCoV-19/E VOC_Alpha betacoron: EPI_ISL_72 | 2020       | Europe    | United Kinj England         | Europe    | United Kinj England    | genome | 29763 | Human | unknown | unknown | B.1.1.7   | GRY | Centre for COVID-19 (Angela Bec <a href="https://www">https://www</a>        | 22-12-2020 |
| Alpha   | hCoV-19/E VOC_Alpha betacoron: EPI_ISL_72 | 2020       | Europe    | United Kinj England         | Europe    | United Kinj England    | genome | 29763 | Human | unknown | unknown | B.1.1.7   | GRY | Centre for COVID-19 (Angela Bec <a href="https://www">https://www</a>        | 22-12-2020 |
| Alpha   | hCoV-19/E VOC_Alpha betacoron: EPI_ISL_72 | 2020       | Europe    | United Kinj England         | Europe    | United Kinj England    | genome | 29763 | Human | unknown | unknown | B.1.1.7   | GRY | Centre for COVID-19 (Angela Bec <a href="https://www">https://www</a>        | 22-12-2020 |
| Alpha   | hCoV-19/E VOC_Alpha betacoron: EPI_ISL_72 | 2020       | Europe    | United Kinj England         | Europe    | United Kinj England    | genome | 29476 | Human | unknown | unknown | B.1.1.7   | GRY | Centre for COVID-19 (Angela Bec <a href="https://www">https://www</a>        | 22-12-2020 |
| Alpha   | hCoV-19/E VOC_Alpha betacoron: EPI_ISL_72 | 2020       | Europe    | United Kinj England         | Europe    | United Kinj England    | genome | 29763 | Human | unknown | unknown | B.1.1.7   | GRY | Centre for COVID-19 (Angela Bec <a href="https://www">https://www</a>        | 22-12-2020 |
| Alpha   | hCoV-19/E VOC_Alpha betacoron: EPI_ISL_72 | 2020       | Europe    | United Kinj England         | Europe    | United Kinj England    | genome | 29763 | Human | unknown | unknown | B.1.1.7   | GRY | Centre for COVID-19 (Angela Bec <a href="https://www">https://www</a>        | 22-12-2020 |
| Alpha   | hCoV-19/E VOC_Alpha betacoron: EPI_ISL_72 | 2020       | Europe    | United Kinj England         | Europe    | United Kinj England    | genome | 29763 | Human | unknown | unknown | B.1.1.7   | GRY | Centre for COVID-19 (Angela Bec <a href="https://www">https://www</a>        | 22-12-2020 |
| Alpha   | hCoV-19/E VOC_Alpha betacoron: EPI_ISL_72 | 2020       | Europe    | United Kinj England         | Europe    | United Kinj England    | genome | 29763 | Human | unknown | unknown | B.1.1.7   | GRY | Centre for COVID-19 (Angela Bec <a href="https://www">https://www</a>        | 22-12-2020 |
| Alpha   | hCoV-19/E VOC_Alpha betacoron: EPI_ISL_74 | 2020       | Europe    | United Kinj England         | Europe    | United Kinj England    | genome | 29763 | Human | unknown | unknown | B.1.1.7   | GRY | Department COVID-19 (Aminu S. J. <a href="https://www">https://www</a>       | 29-12-2020 |
| Alpha   | hCoV-19/E VOC_Alpha betacoron: EPI_ISL_74 | 2020       | Europe    | United Kinj England         | Europe    | United Kinj England    | genome | 29763 | Human | unknown | unknown | B.1.1.7   | GRY | Department COVID-19 (Aminu S. J. <a href="https://www">https://www</a>       | 29-12-2020 |
| Alpha   | hCoV-19/E VOC_Alpha betacoron: EPI_ISL_74 | 2020       | Europe    | United Kinj England         | Europe    | United Kinj England    | genome | 29763 | Human | unknown | unknown | B.1.1.7   | GRY | Centre for COVID-19 (Angela Bec <a href="https://www">https://www</a>        | 29-12-2020 |
| Alpha   | hCoV-19/E VOC_Alpha betacoron: EPI_ISL_74 | 2020       | Europe    | United Kinj England         | Europe    | United Kinj England    | genome | 29763 | Human | unknown | unknown | B.1.1.7   | GRY | Centre for COVID-19 (Angela Bec <a href="https://www">https://www</a>        | 29-12-2020 |
| Alpha   | hCoV-19/E VOC_Alpha betacoron: EPI_ISL_74 | 2020       | Europe    | United Kinj England         | Europe    | United Kinj England    | genome | 29763 | Human | unknown | unknown | B.1.1.7   | GRY | Centre for COVID-19 (Angela Bec <a href="https://www">https://www</a>        | 29-12-2020 |
| Alpha   | hCoV-19/E VOC_Alpha betacoron: EPI_ISL_74 | 2020       | Europe    | United Kinj England         | Europe    | United Kinj England    | genome | 29763 | Human | unknown | unknown | B.1.1.7   | GRY | Centre for COVID-19 (Angela Bec <a href="https://www">https://www</a>        | 29-12-2020 |
| Alpha   | hCoV-19/E VOC_Alpha betacoron: EPI_ISL_74 | 2020       | Europe    | United Kinj England         | Europe    | United Kinj England    | genome | 29763 | Human | unknown | unknown | B.1.1.7   | GRY | Centre for COVID-19 (Angela Bec <a href="https://www">https://www</a>        | 29-12-2020 |
| Alpha   | hCoV-19/E VOC_Alpha betacoron: EPI_ISL_74 | 2020       | Europe    | United Kinj England         | Europe    | United Kinj England    | genome | 29763 | Human | unknown | unknown | B.1.1.7   | GRY | Centre for COVID-19 (Angela Bec <a href="https://www">https://www</a>        | 29-12-2020 |
| Alpha   | hCoV-19/E VOC_Alpha betacoron: EPI_ISL_74 | 2020       | Europe    | United Kinj England         | Europe    | United Kinj England    | genome | 29763 | Human | unknown | unknown | B.1.1.7   | GRY | Centre for COVID-19 (Angela Bec <a href="https://www">https://www</a>        | 29-12-2020 |
| Alpha   | hCoV-19/E VOC_Alpha betacoron: EPI_ISL_74 | 2020       | Europe    | United Kinj England         | Europe    | United Kinj England    | genome | 29763 | Human | unknown | unknown | B.1.1.7   | GRY | Centre for COVID-19 (Angela Bec <a href="https://www">https://www</a>        | 29-12-2020 |
| Alpha   | hCoV-19/E VOC_Alpha betacoron: EPI_ISL_74 | 2020       | Europe    | United Kinj England         | Europe    | United Kinj England    | genome | 29763 | Human | unknown | unknown | B.1.1.7   | GRY | Centre for COVID-19 (Angela Bec <a href="https://www">https://www</a>        | 29-12-2020 |
| Beta    | hCoV-19/E VOC_Beta betacoron: EPI_ISL_77  | 2020       | Europe    | United Kinj England         | Europe    | United Kinj England    | genome | 29834 | Human | 29      | Male    | B.1.351   | GH  | Respiraton COVID-19 (PHE Covid <a href="https://www">https://www</a>         | 6-1-2021   |
| Beta    | hCoV-19/E VOC_Beta betacoron: EPI_ISL_77  | 2020       | Europe    | United Kinj England         | Europe    | United Kinj England    | genome | 29803 | Human | 37      | Male    | B.1.351   | GH  | Respiraton COVID-19 (PHE Covid <a href="https://www">https://www</a>         | 6-1-2021   |
| Beta    | hCoV-19/A VOC_Beta betacoron: EPI_ISL_85  | 2020       | Europe    | Austria                     | Europe    | Austria                | genome | 29773 | Human | unknown | unknown | B.1.351   | GH  | Austrian Aq Berghaler Lukas Endl <a href="https://www">https://www</a>       | 20-1-2021  |
| Beta    | hCoV-19/Z VOC_Beta betacoron: EPI_ISL_11  | 1-9-2020   | Africa    | Zimbabwe                    | Africa    | Zimbabwe               | genome | 29779 | Human | 36      | Male    | B.1.351   | GH  | National M Quadram I Tapfumani <a href="https://www">https://www</a>         | 9-3-2021   |
| Beta    | hCoV-19/N VOC_Beta betacoron: EPI_ISL_13  | 2020       | Europe    | Netherlan Zuid-Holland      | Europe    | Netherlan Zuid-Hollar  | genome | 29757 | Human | unknown | unknown | B.1.351   | GH  | Dutch COV Erasmus M Bas Oude I <a href="https://www">https://www</a>         | 22-3-2021  |
| Beta    | hCoV-19/C VOC_Beta betacoron: EPI_ISL_17  | 2020-02    | Asia      | Qatar Doha                  | Asia      | Qatar Doha             | genome | 29764 | Human | 62      | Male    | B.1.351   | GH  | Ministry of Biomedical BRC: Fatiha M. Benslin                                | 25-4-2021  |
| Beta    | hCoV-19/C VOC_Beta betacoron: EPI_ISL_22  | 27-3-2020  | Asia      | Qatar Doha                  | Asia      | Qatar Doha             | genome | 29764 | Human | 28      | Male    | B.1.351   | GH  | Ministry of Biomedical BRC: Fatih <a href="https://www">https://www</a>      | 26-5-2021  |
| Beta    | hCoV-19/S VOC_Beta betacoron: EPI_ISL_23  | 31-8-2020  | Africa    | South Afric Free State      | Africa    | South Afric Free State | genome | 29804 | Human | 21      | Male    | B.1.351   | G   | Vaccines ai KRISP, KZN Baillie Vick <a href="https://www">https://www</a>    | 31-5-2021  |
| Beta    | hCoV-19/U VOC_Beta betacoron: EPI_ISL_25  | 7-5-2020   | North Ame | USA South Caro Laurens      | North Ame | USA South Carc         | genome | 29800 | Human | unknown | Female  | B.1.351   | GH  | Microbiolo Microbiolo Freeman, J. <a href="https://www">https://www</a>      | 7-6-2021   |
| Beta    | hCoV-19/S VOC_Beta betacoron: EPI_ISL_24  | 28-8-2020  | Africa    | South Afric Eastern Cape    | Africa    | South Afric Eastern Ca | genome | 29890 | Human | 39      | Male    | B.1.351   | GH  | National In National In Amoako Di <a href="https://www">https://www</a>      | 7-6-2021   |
| Beta    | hCoV-19/S VOC_Beta betacoron: EPI_ISL_24  | 2020       | Africa    | South Africa                | Africa    | South Africa           | genome | 29849 | Human | unknown | unknown | B.1.351   | GH  | National In National In Amoako Di <a href="https://www">https://www</a>      | 8-6-2021   |
| Beta    | hCoV-19/S VOC_Beta betacoron: EPI_ISL_24  | 2020       | Africa    | South Africa                | Africa    | South Africa           | genome | 29852 | Human | unknown | unknown | B.1.351   | GH  | National In National In Amoako Di <a href="https://www">https://www</a>      | 8-6-2021   |
| Beta    | hCoV-19/S VOC_Beta betacoron: EPI_ISL_24  | 2020       | Africa    | South Africa                | Africa    | South Africa           | genome | 29856 | Human | unknown | unknown | B.1.351   | GH  | National In National In Amoako Di <a href="https://www">https://www</a>      | 8-6-2021   |
| Beta    | hCoV-19/Z VOC_Beta betacoron: EPI_ISL_24  | 27-5-2020  | Africa    | Zimbabwe Masvingo           | Africa    | Zimbabwe Masvingo      | genome | 29827 | Human | 34      | Male    | B.1.351   | GH  | National M CERi, Centi Air Comod <a href="https://www">https://www</a>       | 11-6-2021  |
| Beta    | hCoV-19/Z VOC_Beta betacoron: EPI_ISL_24  | 9-7-2020   | Africa    | Zimbabwe Masvingo           | Africa    | Zimbabwe Masvingo      | genome | 29847 | Human | 28      | Female  | B.1.351   | G   | National M CERi, Centi Air Comod <a href="https://www">https://www</a>       | 11-6-2021  |
| Beta    | hCoV-19/S VOC_Beta betacoron: EPI_ISL_24  | 4-9-2020   | Africa    | South Afric Gauteng         | Africa    | South Afric Gauteng    | genome | 29828 | Human | unknown | unknown | B.1.351   | GH  | Vaccines ai KRISP, KZN Baillie Vick <a href="https://www">https://www</a>    | 11-6-2021  |
| Beta    | hCoV-19/S VOC_Beta betacoron: EPI_ISL_24  | 8-9-2020   | Africa    | South Afric Free State      | Africa    | South Afric Free State | genome | 29807 | Human | unknown | unknown | B.1.351   | GH  | Vaccines ai KRISP, KZN Baillie Vick <a href="https://www">https://www</a>    | 11-6-2021  |
| Beta    | hCoV-19/S VOC_Beta betacoron: EPI_ISL_24  | 9-9-2020   | Africa    | South Afric Gauteng         | Africa    | South Afric Gauteng    | genome | 29831 | Human | unknown | unknown | B.1.351   | GH  | Vaccines ai KRISP, KZN Baillie Vick <a href="https://www">https://www</a>    | 11-6-2021  |
| Beta    | hCoV-19/S VOC_Beta betacoron: EPI_ISL_24  | 9-9-2020   | Africa    | South Afric Gauteng         | Africa    | South Afric Gauteng    | genome | 29878 | Human | unknown | unknown | B.1.351   | GH  | Vaccines ai KRISP, KZN Baillie Vick <a href="https://www">https://www</a>    | 11-6-2021  |
| Beta    | hCoV-19/S VOC_Beta betacoron: EPI_ISL_24  | 10-9-2020  | Africa    | South Afric Gauteng         | Africa    | South Afric Gauteng    | genome | 29832 | Human | unknown | unknown | B.1.351   | GH  | Vaccines ai KRISP, KZN Baillie Vick <a href="https://www">https://www</a>    | 11-6-2021  |
| Beta    | hCoV-19/S VOC_Beta betacoron: EPI_ISL_24  | 10-9-2020  | Africa    | South Afric Gauteng         | Africa    | South Afric Gauteng    | genome | 29832 | Human | unknown | unknown | B.1.351   | GH  | Vaccines ai KRISP, KZN Baillie Vick <a href="https://www">https://www</a>    | 11-6-2021  |
| Beta    | hCoV-19/S VOC_Beta betacoron: EPI_ISL_24  | 10-9-2020  | Africa    | South Afric Free State      | Africa    | South Afric Free State | genome | 29825 | Human | unknown | unknown | B.1.351   | GH  | Vaccines ai KRISP, KZN Baillie Vick <a href="https://www">https://www</a>    | 11-6-2021  |
| Beta    | hCoV-19/R VOC_Beta betacoron: EPI_ISL_47  | 4-6-2020   | Africa    | Rwanda Rusizi               | Africa    | Rwanda Rusizi          | genome | 29832 | Human | 41      | Male    | B.1.351   | GH  | Rwanda Ni: Africa Cent Enatha Mu <a href="https://www">https://www</a>       | 4-10-2021  |
| Beta    | hCoV-19/U VOC_Beta betacoron: EPI_ISL_51  | 28-8-2020  | Asia      | United Ara Abu Dhabi        | Asia      | United Ara Abu Dhabi   | genome | 29885 | Human | 73      | Male    | B.1.351   | GH  | BTC, Khalif BTC, Khalif Habiba Al <a href="https://www">https://www</a>      | 14-10-2021 |
| Beta    | hCoV-19/U VOC_Beta betacoron: EPI_ISL_66  | 26-6-2020  | Africa    | South Afric NORTH WEST      | Africa    | South Afric NORTH WE   | genome | 29760 | Human | 78      | Female  | B.1.351   | GH  | TSHEPONG National In Amoako Di <a href="https://www">https://www</a>         | 24-11-2021 |
| Gamma   | hCoV-19/F VOC_Gami betacoron: EPI_ISL_24  | 23-3-2020  | Europe    | France Provence-/ Marseille | Europe    | France Provence-/      | genome | 29673 | Human | unknown | unknown | P.1.15    | GR  | MEPHI, Aix MEPHI, Aix Anthony Li <a href="https://www">https://www</a>       | 8-6-2021   |
| Gamma   | hCoV-19/U VOC_Gami betacoron: EPI_ISL_22  | 7-4-2020   | North Ame | USA Illinois                | North Ame | USA Illinois           | genome | 29883 | Human | unknown | unknown | P.1       | GR  | Reditus Lal Reditus Lal Joshua J. G <a href="https://www">https://www</a>    | 25-5-2021  |
| Gamma   | hCoV-19/U VOC_Gami betacoron: EPI_ISL_26  | 23-4-2020  | North Ame | USA Indiana                 | North Ame | USA Indiana            | genome | 29830 | Human | 93      | Male    | P.1       | GR  | ISDH Quantigen Paul J. Chil <a href="https://www">https://www</a>            | 18-6-2021  |
| Gamma   | hCoV-19/U VOC_Gami betacoron: EPI_ISL_22  | 22-7-2020  | North Ame | USA Texas Houston           | North Ame | USA Texas              | genome | 29678 | Human | unknown | unknown | P.1.1     | GR  | Houston M Houston M Randall J. C <a href="https://www">https://www</a>       | 21-5-2021  |
| Gamma   | hCoV-19/U VOC_Gami betacoron: EPI_ISL_22  | 22-7-2020  | North Ame | USA Texas Houston           | North Ame | USA Texas              | genome | 29771 | Human | unknown | unknown | P.1.1     | GR  | Houston M Houston M Randall J. C <a href="https://www">https://www</a>       | 21-5-2021  |
| Gamma   | hCoV-19/U VOC_Gami betacoron: EPI_ISL_22  | 31-7-2020  | North Ame | USA Texas Houston           | North Ame | USA Texas              | genome | 29787 | Human | unknown | unknown | P.1.1     | GR  | Houston M Houston M Randall J. C <a href="https://www">https://www</a>       | 21-5-2021  |

|       |                                                    |            |           |             |                     |             |           |             |             |        |       |         |         |         |           |                                              |                                                |            |
|-------|----------------------------------------------------|------------|-----------|-------------|---------------------|-------------|-----------|-------------|-------------|--------|-------|---------|---------|---------|-----------|----------------------------------------------|------------------------------------------------|------------|
| Gamma | hCoV-19/B VOC_Gam1 betacoron: EPI_ISL_56           | 7-8-2020   | South Ame | Brazil      | Sao Paulo           | South Ame   | Brazil    | Sao Paulo   | genome      | 29886  | Human | unknown | unknown | P.1     | GR        | HOSP STA I Instituto Bi Dimas Tad https://ww | 28-10-2021                                     |            |
| Gamma | hCoV-19/U VOC_Gam1 betacoron: EPI_ISL_22           | 11-8-2020  | North Ame | USA         | Texas               | Houston     | North Ame | USA         | Texas       | genome | 29771 | Human   | unknown | unknown | P.1.1     | GR                                           | Houston M Houston M Randall J. C https://ww    | 21-5-2021  |
| Gamma | hCoV-19/U VOC_Gam1 betacoron: EPI_ISL_22           | 13-8-2020  | North Ame | USA         | Texas               | Houston     | North Ame | USA         | Texas       | genome | 29811 | Human   | unknown | unknown | P.1.1     | G                                            | Houston M Houston M Randall J. C https://ww    | 21-5-2021  |
| Gamma | hCoV-19/B VOC_Gam1 betacoron: EPI_ISL_66           | 24-8-2020  | South Ame | Brazil      | Mato Gros           | Campos Gr   | South Ame | Brazil      | Mato Gros   | genome | 29903 | Human   | 38      | Male    | P.1       | GR                                           | Infectious / Wellington https://ww             | 23-11-2021 |
| Gamma | hCoV-19/S VOC_Gam1 betacoron: EPI_ISL_26           | 6-9-2020   | Europe    | Spain       | Galicia             | Vigo        | Europe    | Spain       | Galicia     | genome | 29856 | Human   | 38      | Male    | P.1.12    | GV                                           | Microbiolo Microbiolo Alfaya N, A https://ww   | 18-6-2021  |
| Gamma | hCoV-19/B VOC_Gam1 betacoron: EPI_ISL_37           | 22-9-2020  | South Ame | Brazil      | Pernambur           | Petrolina   | South Ame | Brazil      | Pernambur   | genome | 29643 | Human   | 27      | Male    | P.1.12    | G                                            | LACEN/PE WallauLab Marcelo H https://ww        | 26-8-2021  |
| Gamma | hCoV-19/B VOC_Gam1 betacoron: EPI_ISL_22           | 1-10-2020  | South Ame | Brazil      | Paraiba             | Ingá        | South Ame | Brazil      | Paraiba     | genome | 29829 | Human   | unknown | unknown | P.1       | GR                                           | Laboratório Coordenaç Vagner For https://ww    | 24-5-2021  |
| Gamma | hCoV-19/B VOC_Gam1 betacoron: EPI_ISL_23           | 26-10-2020 | South Ame | Brazil      | Parana              | Curitiba    | South Ame | Brazil      | Parana      | genome | 29777 | Human   | unknown | unknown | P.1       | GR                                           | Instituto Bi Instituto Di Brazil-UK https://ww | 30-5-2021  |
| Gamma | hCoV-19/B VOC_Gam1 betacoron: EPI_ISL_26           | 26-10-2020 | South Ame | Brazil      | Goias               | Goiania     | South Ame | Brazil      | Goias       | genome | 29865 | Human   | 31      | Female  | P.1       | GR                                           | LACEN do I Instituto Ai Claudio Ta https://ww  | 18-6-2021  |
| Gamma | hCoV-19/B VOC_Gam1 betacoron: EPI_ISL_18           | 3-11-2020  | South Ame | Brazil      | Sao Paulo           | Bauru       | South Ame | Brazil      | Sao Paulo   | genome | 29837 | Human   | 94      | Female  | P.1.14    | GR                                           | Hospital de Instituto Ai Claudio Ta https://ww | 30-4-2021  |
| Gamma | hCoV-19/B VOC_Gam1 betacoron: EPI_ISL_22           | 18-11-2020 | South Ame | Brazil      | Rio de Jane         | Volta Redo  | South Ame | Brazil      | Rio de Jane | genome | 29826 | Human   | unknown | unknown | P.1       | GR                                           | Laboratório Coordenaç Vagner For https://ww    | 25-5-2021  |
| Gamma | hCoV-19/B VOC_Gam1 betacoron: EPI_ISL_22           | 18-11-2020 | South Ame | Brazil      | Rio de Jane         | Tres Rios   | South Ame | Brazil      | Rio de Jane | genome | 29829 | Human   | unknown | unknown | P.1       | GR                                           | Laboratório Coordenaç Vagner For https://ww    | 25-5-2021  |
| Gamma | hCoV-19/B VOC_Gam1 betacoron: EPI_ISL_16           | 30-11-2020 | South Ame | Brazil      | Rio Grande          | Campo Boi   | South Ame | Brazil      | Rio Grande  | genome | 29802 | Human   | 39      | Male    | P.1       | GR                                           | Laboratório Laboratório Alana Witt https://ww  | 18-4-2021  |
| Gamma | hCoV-19/U VOC_Gam1 betacoron: EPI_ISL_26 2020-05   | 2020-05    | North Ame | USA         | Alabama             | Prattville  | North Ame | USA         | Alabama     | genome | 29819 | Human   | 3       | Female  | P.1       | GR                                           | Alabama D Alabama D Adrianna N https://ww      | 25-6-2021  |
| Gamma | hCoV-19/B VOC_Gam1 betacoron: EPI_ISL_32 2020-09   | 2020-09    | South Ame | Brazil      | Rio Grande          | do Sul      | South Ame | Brazil      | Rio Grande  | genome | 29868 | Human   | 40      | Female  | P.1       | GR                                           | LABCOVID LABRESIS_ J Wink PL, N https://ww     | 3-8-2021   |
| Gamma | hCoV-19/B VOC_Gam1 betacoron: EPI_ISL_32 2020-11   | 2020-11    | South Ame | Brazil      | Rio Grande          | do Sul      | South Ame | Brazil      | Rio Grande  | genome | 29821 | Human   | 48      | Female  | P.1       | GR                                           | LABRESIS LABRESIS Wink PL, N https://ww        | 4-8-2021   |
| Gamma | hCoV-19/U VOC_Gam1 betacoron: EPI_ISL_29 2020-12   | 2020-12    | North Ame | USA         | Florida             |             | North Ame | USA         | Florida     | genome | 29837 | Human   | unknown | unknown | P.1.10    | GR                                           | UF Health : Salemi Lab Magalis BR https://ww   | 19-7-2021  |
| Gamma | hCoV-19/U VOC_Gam1 betacoron: EPI_ISL_29 2020-12   | 2020-12    | North Ame | USA         | Florida             | Gainesville | North Ame | USA         | Florida     | genome | 29786 | Human   | unknown | unknown | P.1.10    | G                                            | UF Health : Salemi Lab Magalis BR https://ww   | 19-7-2021  |
| Gamma | hCoV-19/U VOC_Gam1 betacoron: EPI_ISL_29 2020-12   | 2020-12    | North Ame | USA         | Florida             | Gainesville | North Ame | USA         | Florida     | genome | 29817 | Human   | unknown | unknown | P.1.10    | GR                                           | UF Health : Salemi Lab Magalis BR https://ww   | 19-7-2021  |
| Delta | hCoV-19/U VOC_Delta betacoron: EPI_ISL_66          | 12-3-2020  | North Ame | USA         | New York            | Westchest   | North Ame | USA         | New York    | genome | 29769 | Human   | 37      | Female  | AY.23     | GK                                           | Molecular Genomics   Weihua H. https://ww      | 23-11-2021 |
| Delta | hCoV-19/U VOC_Delta betacoron: EPI_ISL_53          | 13-7-2020  | North Ame | USA         | Texas               | Houston     | North Ame | USA         | Texas       | genome | 29783 | Human   | unknown | unknown | AY.122    | GK                                           | Houston M Houston M Randall J. C https://ww    | 20-10-2021 |
| Delta | hCoV-19/U VOC_Delta betacoron: EPI_ISL_53          | 15-7-2020  | North Ame | USA         | Texas               | Houston     | North Ame | USA         | Texas       | genome | 29783 | Human   | unknown | unknown | AY.100    | GK                                           | Houston M Houston M Randall J. C https://ww    | 20-10-2021 |
| Delta | hCoV-19/U VOC_Delta betacoron: EPI_ISL_46          | 21-7-2020  | North Ame | USA         | West Virginia       |             | North Ame | USA         | West Virgi  | genome | 29818 | Human   | 67      | Male    | AY.25     | GK                                           | United Hos WVU and J Mages Den https://ww      | 1-10-2021  |
| Delta | hCoV-19/Ir VOC_Delta betacoron: EPI_ISL_53         | 29-7-2020  | Asia      | Indonesia   | Jambi               | Jambi       | Asia      | Indonesia   | Jambi       | genome | 29775 | Human   | 50      | Male    | AY.23     | GK                                           | Raden Mat Eijkman Re Sukma Okt https://ww      | 21-10-2021 |
| Delta | hCoV-19/Ir VOC_Delta betacoron: EPI_ISL_53         | 29-7-2020  | Asia      | Indonesia   | Jambi               | Jambi       | Asia      | Indonesia   | Jambi       | genome | 29769 | Human   | 7       | Male    | AY.23     | GK                                           | Raden Mat Eijkman Re Lydia V Par https://ww    | 21-10-2021 |
| Delta | hCoV-19/Ir VOC_Delta betacoron: EPI_ISL_53         | 29-7-2020  | Asia      | Indonesia   | Jambi               | Jambi       | Asia      | Indonesia   | Jambi       | genome | 29769 | Human   | 39      | Male    | AY.24     | GK                                           | Raden Mat Eijkman Re Willy Agus https://ww     | 21-10-2021 |
| Delta | hCoV-19/Ir VOC_Delta betacoron: EPI_ISL_53         | 29-7-2020  | Asia      | Indonesia   | Jambi               | Jambi       | Asia      | Indonesia   | Jambi       | genome | 29769 | Human   | 46      | Female  | AY.23     | GK                                           | Raden Mat Eijkman Re Jessica R S https://ww    | 21-10-2021 |
| Delta | hCoV-19/Ir VOC_Delta betacoron: EPI_ISL_53         | 29-7-2020  | Asia      | Indonesia   | Jambi               | Jambi       | Asia      | Indonesia   | Jambi       | genome | 29769 | Human   | 32      | Female  | AY.23     | GK                                           | Raden Mat Eijkman Re Sukma Okt https://ww      | 21-10-2021 |
| Delta | hCoV-19/E VOC_Delta betacoron: EPI_ISL_52          | 3-8-2020   | Europe    | United Kinj | England             |             | Europe    | United Kinj | England     | genome | 29769 | Human   | unknown | unknown | AY.4      | GK                                           | Respirator COVID-19 (PHE Covid https://ww      | 18-10-2021 |
| Delta | hCoV-19/U VOC_Delta betacoron: EPI_ISL_50          | 12-8-2020  | North Ame | USA         | California          | Los Angele  | North Ame | USA         | California  | genome | 29598 | Human   | unknown | unknown | AY.3      | GK                                           | Torrance I Los Angele P. Hemaraj https://ww    | 12-10-2021 |
| Delta | hCoV-19/U VOC_Delta betacoron: EPI_ISL_45          | 21-8-2020  | North Ame | USA         | US Virgin I         | St. Croix   | North Ame | USA         | US Virgin I | genome | 29775 | Human   | unknown | unknown | B.1.617.2 | GK                                           | VIDOH (Vir Grubaugh   Joseph Fau https://ww    | 29-9-2021  |
| Delta | hCoV-19/U VOC_Delta betacoron: EPI_ISL_45          | 21-8-2020  | North Ame | USA         | US Virgin I         | St. Croix   | North Ame | USA         | US Virgin I | genome | 29775 | Human   | unknown | unknown | AY.35     | GK                                           | VIDOH (Vir Grubaugh   Joseph Fau https://ww    | 29-9-2021  |
| Delta | hCoV-19/F VOC_Delta betacoron: EPI_ISL_48          | 25-8-2020  | Oceania   | Fiji        |                     |             | Oceania   | Fiji        |             | genome | 29835 | Human   | unknown | unknown | AY.82     | G                                            | Fiji Centre Microbiolo Sahukhan, https://ww    | 4-10-2021  |
| Delta | hCoV-19/U VOC_Delta betacoron: EPI_ISL_52          | 31-8-2020  | North Ame | USA         | California          | San Diego   | North Ame | USA         | California  | genome | 29804 | Human   | unknown | unknown | B.1.617.2 | GK                                           | San Diego   Andersen I SEARCH Al https://ww    | 15-10-2021 |
| Delta | hCoV-19/U VOC_Delta betacoron: EPI_ISL_45          | 2-9-2020   | North Ame | USA         | Wyoming             |             | North Ame | USA         | Wyoming     | genome | 29818 | Human   | 10      | Male    | AY.3      | GK                                           | Wyoming   Wyoming F Jim Milde https://ww       | 28-9-2021  |
| Delta | hCoV-19/Ir VOC_Delta betacoron: EPI_ISL_24         | 7-9-2020   | Asia      | India       | Madhya Pradesh      |             | Asia      | India       | Madhya Pr   | genome | 29778 | Human   | 63      | Male    | AY.122    | GK                                           | National Cr NCDC Delh Radhakrist https://ww    | 9-6-2021   |
| Delta | hCoV-19/U VOC_Delta betacoron: EPI_ISL_48          | 9-9-2020   | North Ame | USA         | North Dakota        |             | North Ame | USA         | North Dak   | genome | 29775 | Human   | unknown | unknown | AY.44     | GK                                           | North Dak North Dak Lisha Winge https://ww     | 4-10-2021  |
| Delta | hCoV-19/R VOC_Delta betacoron: EPI_ISL_47          | 10-9-2020  | Africa    | Rwanda      | Nyarugenge          |             | Africa    | Rwanda      | Nyarugeng   | genome | 29804 | Human   | 34      | Male    | B.1.617.2 | GK                                           | Rwanda Ni Africa Cent Enatha Mu https://ww     | 4-10-2021  |
| Delta | hCoV-19/B VOC_Delta betacoron: EPI_ISL_42          | 16-9-2020  | Africa    | Burkina Fa: | Ouagadougou         |             | Africa    | Burkina Fa: | Ouagadoug   | genome | 29842 | Human   | unknown | unknown | AY.36     | GK                                           | Centre Hos Africa Cent Olawoye, I https://ww   | 17-9-2021  |
| Delta | hCoV-19/B VOC_Delta betacoron: EPI_ISL_42          | 18-9-2020  | Africa    | Burkina Fa: | Ouagadougou         |             | Africa    | Burkina Fa: | Ouagadoug   | genome | 29808 | Human   | unknown | unknown | AY.36     | GK                                           | Centre Hos Africa Cent Olawoye, I https://ww   | 17-9-2021  |
| Delta | hCoV-19/A VOC_Delta betacoron: EPI_ISL_29          | 22-9-2020  | North Ame | Mexico      | Aguascalientes      |             | North Ame | Mexico      | Aguascalie  | genome | 29814 | Human   | 22      | Female  | AY.100    | GK                                           | LESP Agua: Instituto Di Claudia W https://ww   | 14-7-2021  |
| Delta | hCoV-19/Ir VOC_Delta betacoron: EPI_ISL_34 2020-10 | 2020-10    | Asia      | India       | Maharashtra         |             | Asia      | India       | Maharash    | genome | 29873 | Human   | 12      | Male    | AY.50     | GK                                           | Indian Cou Indian Cou Pragma Yac https://ww    | 18-8-2021  |
| Delta | hCoV-19/Ir VOC_Delta betacoron: EPI_ISL_34 2020-10 | 2020-10    | Asia      | India       | Maharashtra         |             | Asia      | India       | Maharash    | genome | 29886 | Human   | 17      | Female  | B.1.617.2 | GK                                           | Indian Cou Indian Cou Pragma Yac https://ww    | 18-8-2021  |
| Delta | hCoV-19/F VOC_Delta betacoron: EPI_ISL_63 2020-10  | 2020-10    | Europe    | France      | Provence-/Marseille |             | Europe    | France      | Provence-/  | genome | 29689 | Human   | unknown | unknown | AY.43     | GK                                           | MEPHI, Aix MEPHI, Aix Ananya LI https://ww     | 16-11-2021 |
| Mu    | hCoV-19/C VOI_Mu_h betacoron: EPI_ISL_12           | 11-1-2021  | South Ame | Colombia    | Magdalena           |             | South Ame | Colombia    | Magdalene   | genome | 29494 | Human   | unknown | Female  | B.1.621   | GH                                           | Universida Instituto N Katherine I https://ww  | 11-3-2021  |
| Mu    | hCoV-19/U VOI_Mu_h betacoron: EPI_ISL_26           | 2021       | North Ame | USA         | California          |             | North Ame | USA         | California  | genome | 29902 | Human   | unknown | unknown | B.1.621   | GH                                           | Helix Helix Celina And https://ww              | 21-6-2021  |
| Mu    | hCoV-19/E VOI_Mu_h betacoron: EPI_ISL_27           | 2021       | Europe    | United Kinj | England             |             | Europe    | United Kinj | England     | genome | 29819 | Human   | unknown | unknown | B.1.621   | GH                                           | Respirator COVID-19 (PHE Covid https://ww      | 30-6-2021  |
| Mu    | hCoV-19/E VOI_Mu_h betacoron: EPI_ISL_27           | 2021       | Europe    | United Kinj | England             |             | Europe    | United Kinj | England     | genome | 29818 | Human   | unknown | unknown | B.1.621.1 | GH                                           | Respirator COVID-19 (PHE Covid https://ww      | 30-6-2021  |
| Mu    | hCoV-19/E VOI_Mu_h betacoron: EPI_ISL_27           | 2021       | Europe    | United Kinj | England             |             | Europe    | United Kinj | England     | genome | 29835 | Human   | unknown | unknown | B.1.621.1 | GH                                           | Respirator COVID-19 (PHE Covid https://ww      | 30-6-2021  |
| Mu    | hCoV-19/E VOI_Mu_h betacoron: EPI_ISL_27           | 2021       | Europe    | United Kinj | England             |             | Europe    | United Kinj | England     | genome | 29834 | Human   | unknown | unknown | B.1.621.1 | GH                                           | Respirator COVID-19 (PHE Covid https://ww      | 30-6-2021  |
| Mu    | hCoV-19/N VOI_Mu_h betacoron: EPI_ISL_27           | 2021       | Europe    | United Kinj | Northern Ireland    |             | Europe    | United Kinj | Northern I  | genome | 29830 | Human   | unknown | unknown | B.1.621.1 | GH                                           | Respirator COVID-19 (PHE Covid https://ww      | 30-6-2021  |
| Mu    | hCoV-19/U VOI_Mu_h betacoron: EPI_ISL_29 2020-12   | 2020-12    | North Ame | USA         | Florida             |             | North Ame | USA         | Florida     | genome | 29747 | Human   | unknown | unknown | B.1.621.1 | GH                                           | UF Health : Salemi Lab Magalis BR https://ww   | 19-7-2021  |
| Mu    | hCoV-19/U VOI_Mu_h betacoron: EPI_ISL_31           | 2021       | North Ame | USA         | Georgia             |             | North Ame | USA         | Georgia     | genome | 29835 | Human   | unknown | unknown | B.1.621   | GH                                           | GA Depart: GA Depart: Stacy Reev https://ww    | 27-7-2021  |
| Mu    | hCoV-19/U VOI_Mu_h betacoron: EPI_ISL_31           | 2021       | North Ame | USA         | Georgia             |             | North Ame | USA         | Georgia     | genome | 29835 | Human   | unknown | unknown | B.1.621   | GH                                           | GA Depart: GA Depart: Stacy Reev https://ww    | 27-7-2021  |
| Mu    | hCoV-19/V VOI_Mu_h betacoron: EPI_ISL_35           | 21-1-2021  | South Ame | Venezuela   | Falcon              |             | South Ame | Venezuela   | Falcon      | genome | 29831 | Human   | unknown | unknown | B.1.621   | GH                                           | Instituto V Laboratorij Rossana C https://ww   | 19-8-2021  |
| Mu    | hCoV-19/F VOI_Mu_h betacoron: EPI_ISL_35           | 2021       | Europe    | France      | Ile-de-France       |             | Europe    | France      | Ile-de-Fran | genome | 29822 | Human   | 28      | Female  | B.1.621   | GH                                           | LBM Porte CERBA Hea Bénédicte https://ww       | 20-8-2021  |
| Mu    | hCoV-19/F VOI_Mu_h betacoron: EPI_ISL_35           | 2021       | Europe    | France      | Occitanie           |             | Europe    | France      | Occitanie   | genome | 29817 | Human   | 15      | Female  | B.1.621   | GH                                           | LBM Cerba CERBA Hea Bénédicte https://ww       | 20-8-2021  |
| Mu    | hCoV-19/E VOI_Mu_h betacoron: EPI_ISL_35           | 2021       | Europe    | United Kinj | England             |             | Europe    | United Kinj | England     | genome | 29525 | Human   | unknown | unknown | B.1.621   | GH                                           | Respirator COVID-19 (PHE Covid https://ww      | 23-8-2021  |
| Mu    | hCoV-19/F VOI_Mu_h betacoron: EPI_ISL_37           | 2021       | Europe    | France      | Ile-de-France       |             | Europe    | France      | Ile-de-Fran | genome | 29843 | Human   | 23      | Female  | B.1.621   | GH                                           | EYLAU - Ur CERBA Hea Bénédicte https://ww      | 26-8-2021  |
| Mu    | hCoV-19/F VOI_Mu_h betacoron: EPI_ISL_38           | 2021       | Europe    | France      | Centre-Val de Loire |             | Europe    | France      | Centre-Val  | genome | 29817 | Human   | 6       | Female  | B.1.621   | GH                                           | Laboratoir CERBA Hea Bénédicte https://ww      | 2-9-2021   |

|        |                                           |            |           |             |                    |            |             |                     |                    |       |         |         |           |         |                                                |                                              |            |
|--------|-------------------------------------------|------------|-----------|-------------|--------------------|------------|-------------|---------------------|--------------------|-------|---------|---------|-----------|---------|------------------------------------------------|----------------------------------------------|------------|
| Mu     | hCoV-19/F VOI_Mu_h betacoron: EPI_ISL_41  | 2021       | Europe    | France      | Nouvelle-Aquitaine | Europe     | France      | Nouvelle-A genome   | 29827              | Human | 28      | Female  | B.1.621.1 | GH      | Cerballianc CERBA Hea Bénédicte https://ww     | 15-9-2021                                    |            |
| Mu     | hCoV-19/C VOI_Mu_h betacoron: EPI_ISL_56  | 2021       | South Ame | Colombia    | Valle del Cauca    | South Ame  | Colombia    | Valle del C; genome | 29781              | Human | unknown | Male    | B.1.621   | GH      | SYNLAB ÁN Laboratorik Fredy A. Tz https://ww   | 27-10-2021                                   |            |
| Mu     | hCoV-19/C VOI_Mu_h betacoron: EPI_ISL_56  | 2021       | South Ame | Colombia    | Valle del Cauca    | South Ame  | Colombia    | Valle del C; genome | 29781              | Human | unknown | Female  | B.1.621   | GH      | SYNLAB ÁN Laboratorik Fredy A. Tz https://ww   | 27-10-2021                                   |            |
| Mu     | hCoV-19/C VOI_Mu_h betacoron: EPI_ISL_56  | 2021       | South Ame | Colombia    | Valle del Cauca    | South Ame  | Colombia    | Valle del C; genome | 29781              | Human | unknown | Female  | B.1.621   | GH      | SYNLAB ÁN Laboratorik Fredy A. Tz https://ww   | 27-10-2021                                   |            |
| Mu     | hCoV-19/C VOI_Mu_h betacoron: EPI_ISL_56  | 2021       | South Ame | Colombia    | Valle del Cauca    | South Ame  | Colombia    | Valle del C; genome | 29775              | Human | unknown | Female  | B.1.621   | GH      | SYNLAB ÁN Laboratorik Fredy A. Tz https://ww   | 27-10-2021                                   |            |
| Mu     | hCoV-19/C VOI_Mu_h betacoron: EPI_ISL_56  | 2021       | South Ame | Colombia    | Valle del Cauca    | South Ame  | Colombia    | Valle del C; genome | 29778              | Human | unknown | Male    | B.1.621   | GH      | SYNLAB ÁN Laboratorik Fredy A. Tz https://ww   | 27-10-2021                                   |            |
| Mu     | hCoV-19/C VOI_Mu_h betacoron: EPI_ISL_56  | 2021       | South Ame | Colombia    | Valle del Cauca    | South Ame  | Colombia    | Valle del C; genome | 29781              | Human | unknown | Female  | B.1.621   | GH      | SYNLAB ÁN Laboratorik Fredy A. Tz https://ww   | 27-10-2021                                   |            |
| Mu     | hCoV-19/U VOI_Mu_h betacoron: EPI_ISL_57  | 2021       | North Ame | USA         | Indiana            | North Ame  | USA         | Indiana genome      | 29799              | Human | 38      | Female  | B.1.621   | GH      | PPHC-Purd Animal Dis Rebeckca F https://ww     | 29-10-2021                                   |            |
| Mu     | hCoV-19/C VOI_Mu_h betacoron: EPI_ISL_65  | 14-10-2020 | South Ame | Colombia    | Antioquia          | Apartado   | South Ame   | Colombia            | Antioquia genome   | 29781 | Human   | 89      | Male      | B.1.621 | GH                                             | SOMER Laboratorik Idabely Be https://ww      | 19-11-2021 |
| GH     | hCoV-19/Ir VUM_GH_ betacoron: EPI_ISL_31  | 18-5-2021  | Asia      | Indonesia   | Jambi              | Jambi      | Asia        | Indonesia           | Jambi genome       | 29782 | Human   | 18      | Female    | B.1.640 | GH                                             | RSUD Rade Eijkman In: Sukma Okt https://ww   | 1-8-2021   |
| GH     | hCoV-19/C VUM_GH_ betacoron: EPI_ISL_55   | 28-9-2021  | Africa    | Republic of | Brazzaville        | Africa     | Republic of | Brazzaville genome  | 29683              | Human | 39      | Female  | B.1.640   | GH      | Fondation Fondation Mfoutou N https://ww       | 27-10-2021                                   |            |
| GH     | hCoV-19/C VUM_GH_ betacoron: EPI_ISL_64   | 2-10-2021  | North Ame | Canada      | Quebec             | North Ame  | Canada      | Quebec genome       | 29734              | Human | 34      | unknown | B.1.640   | GH      | Laboratoiri Laboratoiri Sandrine N https://ww  | 18-11-2021                                   |            |
| GH     | hCoV-19/S VUM_GH_ betacoron: EPI_ISL_55   | 6-10-2021  | Europe    | Switzerland | Vaud               | Europe     | Switzerland | Vaud genome         | 29788              | Human | unknown | unknown | B.1.640   | GH      | Viollier AG Departmer CHRISTIAN B https://ww   | 26-10-2021                                   |            |
| GH     | hCoV-19/E VUM_GH_ betacoron: EPI_ISL_54   | 11-10-2021 | Europe    | United Kin  | England            | Europe     | United Kin  | England genome      | 29779              | Human | unknown | unknown | B.1.640   | GH      | Respirator COVID-19 ( PHE Covid https://ww     | 25-10-2021                                   |            |
| GH     | hCoV-19/F VUM_GH_ betacoron: EPI_ISL_56   | 12-10-2021 | Europe    | France      | Bretagne           | Bannalec   | Europe      | France              | Bretagne genome    | 29799 | Human   | 9       | Female    | B.1.640 | GH                                             | Laboratoiri CHU Pontc GROLHIER https://ww    | 28-10-2021 |
| GH     | hCoV-19/F VUM_GH_ betacoron: EPI_ISL_56   | 12-10-2021 | Europe    | France      | Bretagne           | Bannalec   | Europe      | France              | Bretagne genome    | 29796 | Human   | 9       | Male      | B.1.640 | GH                                             | Laboratoiri CHU Pontc GROLHIER https://ww    | 28-10-2021 |
| GH     | hCoV-19/F VUM_GH_ betacoron: EPI_ISL_56   | 12-10-2021 | Europe    | France      | Bretagne           | Bannalec   | Europe      | France              | Bretagne genome    | 29821 | Human   | 10      | Male      | B.1.640 | GH                                             | Laboratoiri CHU Pontc GROLHIER https://ww    | 28-10-2021 |
| GH     | hCoV-19/F VUM_GH_ betacoron: EPI_ISL_59   | 12-10-2021 | Europe    | France      | Provence-/         | Alpes-Mari | Europe      | France              | Provence-/ genome  | 29728 | Human   | 36      | Male      | B.1.640 | GH                                             | LABORATC CNR Virus ( Antonin Bz https://ww   | 4-11-2021  |
| GH     | hCoV-19/F VUM_GH_ betacoron: EPI_ISL_56   | 14-10-2021 | Europe    | France      | Bretagne           | Bannalec   | Europe      | France              | Bretagne genome    | 29770 | Human   | 10      | Male      | B.1.640 | GH                                             | Laboratoiri CHU Pontc GROLHIER https://ww    | 28-10-2021 |
| GH     | hCoV-19/E VUM_GH_ betacoron: EPI_ISL_55   | 16-10-2021 | Europe    | France      | Ile-de-France      | Europe     | France      | Ile-de-Fran genome  | 29822              | Human | 36      | Female  | B.1.640   | G       | LBM Porte CERBA Hea Bénédicte https://ww       | 27-10-2021                                   |            |
| GH     | hCoV-19/S VUM_GH_ betacoron: EPI_ISL_56   | 18-10-2021 | Europe    | United Kin  | Scotland           | Europe     | United Kin  | Scotland genome     | 29434              | Human | unknown | unknown | B.1.640   | GH      | Lighthouse Wellcome : Harper Var https://ww    | 27-10-2021                                   |            |
| GH     | hCoV-19/F VUM_GH_ betacoron: EPI_ISL_56   | 18-10-2021 | Europe    | France      | Bretagne           | Bannalec   | Europe      | France              | Bretagne genome    | 29770 | Human   | 10      | Male      | B.1.640 | GH                                             | Laboratoiri CHU Pontc GROLHIER https://ww    | 28-10-2021 |
| GH     | hCoV-19/F VUM_GH_ betacoron: EPI_ISL_56   | 18-10-2021 | Europe    | France      | Bretagne           | Bannalec   | Europe      | France              | Bretagne genome    | 29829 | Human   | 10      | Male      | B.1.640 | GH                                             | Laboratoiri CHU Pontc GROLHIER https://ww    | 28-10-2021 |
| GH     | hCoV-19/F VUM_GH_ betacoron: EPI_ISL_56   | 18-10-2021 | Europe    | France      | Bretagne           | Bannalec   | Europe      | France              | Bretagne genome    | 29733 | Human   | 5       | Female    | B.1.640 | GH                                             | Laboratoiri CHU Pontc GROLHIER https://ww    | 28-10-2021 |
| GH     | hCoV-19/C VUM_GH_ betacoron: EPI_ISL_60   | 19-10-2021 | Africa    | Republic of | Brazzaville        | Africa     | Republic of | Brazzaville genome  | 29714              | Human | 32      | Female  | B.1.640   | GH      | Fondation Fondation Mfoutou N https://ww       | 9-11-2021                                    |            |
| GH     | hCoV-19/F VUM_GH_ betacoron: EPI_ISL_56   | 20-10-2021 | Europe    | France      | Bretagne           | Bannalec   | Europe      | France              | Bretagne genome    | 29770 | Human   | 12      | Female    | B.1.640 | GH                                             | Laboratoiri CHU Pontc GROLHIER https://ww    | 28-10-2021 |
| GH     | hCoV-19/C VUM_GH_ betacoron: EPI_ISL_60   | 20-10-2021 | Africa    | Republic of | Brazzaville        | Africa     | Republic of | Brazzaville genome  | 29649              | Human | 4       | Female  | B.1.640   | GH      | Fondation Fondation Mfoutou N https://ww       | 9-11-2021                                    |            |
| GH     | hCoV-19/F VUM_GH_ betacoron: EPI_ISL_64   | 21-10-2021 | Europe    | France      | Bretagne           | Vannes     | Europe      | France              | Bretagne genome    | 29733 | Human   | 16      | Female    | B.1.640 | GH                                             | Labo Analy National Rr Marion Bai https://ww | 18-11-2021 |
| GH     | hCoV-19/F VUM_GH_ betacoron: EPI_ISL_62   | 22-10-2021 | Europe    | France      | Ile-de-France      | Europe     | France      | Ile-de-Fran genome  | 29741              | Human | 76      | Male    | B.1.640   | GH      | Hôpital Loi Departmer Christophe https://ww    | 12-11-2021                                   |            |
| GH     | hCoV-19/It VUM_GH_ betacoron: EPI_ISL_57  | 23-10-2021 | Europe    | Italy       | Lazio              | Rome       | Europe      | Italy               | Lazio genome       | 29774 | Human   | unknown | Male      | B.1.640 | GH                                             | IRCCS San r IRCCS Regi Frauke Go https://ww  | 31-10-2021 |
| GH     | hCoV-19/C VUM_GH_ betacoron: EPI_ISL_60   | 23-10-2021 | Africa    | Republic of | Brazzaville        | Africa     | Republic of | Brazzaville genome  | 29714              | Human | 43      | Female  | B.1.640   | GH      | Fondation Fondation Mfoutou N https://ww       | 9-11-2021                                    |            |
| GH     | hCoV-19/F VUM_GH_ betacoron: EPI_ISL_59   | 25-10-2021 | Europe    | France      | Ile-de-France      | Europe     | France      | Ile-de-Fran genome  | 29814              | Human | 61      | Male    | B.1.640   | GH      | LBM Bois d CERBA Hea Bénédicte https://ww      | 4-11-2021                                    |            |
| GH     | hCoV-19/C VUM_GH_ betacoron: EPI_ISL_60   | 25-10-2021 | Africa    | Republic of | Brazzaville        | Africa     | Republic of | Brazzaville genome  | 29683              | Human | 35      | Male    | B.1.640   | GH      | Fondation Fondation Mfoutou N https://ww       | 9-11-2021                                    |            |
| GH     | hCoV-19/F VUM_GH_ betacoron: EPI_ISL_63   | 25-10-2021 | Europe    | France      | Ile-de-Fran        | Lisses     | Europe      | France              | Ile-de-Fran genome | 29745 | Human   | 61      | Male      | B.1.640 | GH                                             | Labo Analy National Rr Marion Bai https://ww | 16-11-2021 |
| Lambda | hCoV-19/E VOI_Lambi betacoron: EPI_ISL_16 | 2021       | South Ame | Ecuador     | Guayas             | South Ame  | Ecuador     | Guayas genome       | 29783              | Human | unknown | unknown | C.37      | GR      | Omics Scie Omics Scie Derly Andr https://ww    | 19-4-2021                                    |            |
| Lambda | hCoV-19/P VOI_Lambi betacoron: EPI_ISL_59 | 21-7-2020  | South Ame | Peru        | Lima               | South Ame  | Peru        | Lima genome         | 29769              | Human | 38      | Male    | C.37      | GR      | Laboratorik Laboratorik Carlos Pad https://ww  | 5-11-2021                                    |            |
| Lambda | hCoV-19/A VOI_Lambi betacoron: EPI_ISL_21 | 8-11-2020  | South Ame | Argentina   | Ciudad Autonoma de | South Ame  | Argentina   | Ciudad Aut genome   | 29792              | Human | 27      | Female  | C.37      | GR      | Servicio Vir Instituto N Baumeiste https://ww  | 19-5-2021                                    |            |
| Lambda | hCoV-19/P VOI_Lambi betacoron: EPI_ISL_15 | 22-12-2020 | South Ame | Peru        | Lima               | South Ame  | Peru        | Lima genome         | 29496              | Human | 34      | Female  | C.37      | GR      | Laboratorik Laboratorik Carlos Pad https://ww  | 11-4-2021                                    |            |
| Lambda | hCoV-19/P VOI_Lambi betacoron: EPI_ISL_16 | 1-1-2021   | South Ame | Peru        | Lima               | South Ame  | Peru        | Lima genome         | 29744              | Human | unknown | unknown | C.37      | GR      | Instituto di Laboratorik Lenin Mati https://ww | 18-4-2021                                    |            |
| Lambda | hCoV-19/P VOI_Lambi betacoron: EPI_ISL_34 | 8-1-2021   | South Ame | Peru        | San Martin         | South Ame  | Peru        | San Martin genome   | 29791              | Human | 22      | Male    | C.37      | GR      | Laboratorik Laboratorik Carlos Pad https://ww  | 14-8-2021                                    |            |
| Lambda | hCoV-19/P VOI_Lambi betacoron: EPI_ISL_34 | 9-1-2021   | South Ame | Peru        | San Martin         | South Ame  | Peru        | San Martin genome   | 29786              | Human | 25      | Male    | C.37      | GR      | Laboratorik Laboratorik Carlos Pad https://ww  | 14-8-2021                                    |            |
| Lambda | hCoV-19/P VOI_Lambi betacoron: EPI_ISL_34 | 11-1-2021  | South Ame | Peru        | San Martin         | South Ame  | Peru        | San Martin genome   | 29783              | Human | 40      | Female  | C.37      | GR      | Laboratorik Laboratorik Carlos Pad https://ww  | 14-8-2021                                    |            |
| Lambda | hCoV-19/P VOI_Lambi betacoron: EPI_ISL_11 | 12-1-2021  | South Ame | Peru        | Lima               | South Ame  | Peru        | Lima genome         | 29496              | Human | 47      | Female  | C.37      | GR      | Laboratorik Laboratorik Carlos Pad https://ww  | 4-3-2021                                     |            |
| Lambda | hCoV-19/P VOI_Lambi betacoron: EPI_ISL_11 | 12-1-2021  | South Ame | Peru        | Lima               | South Ame  | Peru        | Lima genome         | 29496              | Human | 38      | Female  | C.37      | GR      | Laboratorik Laboratorik Carlos Pad https://ww  | 4-3-2021                                     |            |
| Lambda | hCoV-19/P VOI_Lambi betacoron: EPI_ISL_11 | 12-1-2021  | South Ame | Peru        | Lima               | South Ame  | Peru        | Lima genome         | 29496              | Human | 74      | Female  | C.37      | GR      | Laboratorik Laboratorik Carlos Pad https://ww  | 4-3-2021                                     |            |
| Lambda | hCoV-19/P VOI_Lambi betacoron: EPI_ISL_11 | 17-1-2021  | South Ame | Peru        | Callao             | South Ame  | Peru        | Callao genome       | 29901              | Human | unknown | unknown | C.37      | GR      | Laboratorik Laboratorik Ronnie Ga https://ww   | 1-3-2021                                     |            |
| Lambda | hCoV-19/P VOI_Lambi betacoron: EPI_ISL_11 | 17-1-2021  | South Ame | Peru        | Lima               | South Ame  | Peru        | Lima genome         | 29890              | Human | unknown | unknown | C.37      | GR      | Laboratorik Laboratorik Ronnie Ga https://ww   | 1-3-2021                                     |            |
| Lambda | hCoV-19/P VOI_Lambi betacoron: EPI_ISL_11 | 17-1-2021  | South Ame | Peru        | Lima               | South Ame  | Peru        | Lima genome         | 29901              | Human | unknown | unknown | C.37      | GR      | Laboratorik Laboratorik Ronnie Ga https://ww   | 1-3-2021                                     |            |
| Lambda | hCoV-19/P VOI_Lambi betacoron: EPI_ISL_11 | 17-1-2021  | South Ame | Peru        | Lima               | South Ame  | Peru        | Lima genome         | 29898              | Human | unknown | unknown | C.37      | GR      | Laboratorik Laboratorik Ronnie Ga https://ww   | 1-3-2021                                     |            |
| Lambda | hCoV-19/P VOI_Lambi betacoron: EPI_ISL_11 | 17-1-2021  | South Ame | Peru        | Lima               | South Ame  | Peru        | Lima genome         | 29895              | Human | unknown | unknown | C.37      | GR      | Laboratorik Laboratorik Ronnie Ga https://ww   | 1-3-2021                                     |            |
| Lambda | hCoV-19/P VOI_Lambi betacoron: EPI_ISL_11 | 17-1-2021  | South Ame | Peru        | Lima               | South Ame  | Peru        | Lima genome         | 29899              | Human | unknown | unknown | C.37      | GR      | Laboratorik Laboratorik Ronnie Ga https://ww   | 1-3-2021                                     |            |
| Lambda | hCoV-19/P VOI_Lambi betacoron: EPI_ISL_11 | 17-1-2021  | South Ame | Peru        | Lima               | South Ame  | Peru        | Lima genome         | 29863              | Human | unknown | unknown | C.37      | GR      | Laboratorik Laboratorik Ronnie Ga https://ww   | 1-3-2021                                     |            |
| Lambda | hCoV-19/P VOI_Lambi betacoron: EPI_ISL_11 | 17-1-2021  | South Ame | Peru        | Lima               | South Ame  | Peru        | Lima genome         | 29895              | Human | unknown | unknown | C.37      | GR      | Laboratorik Laboratorik Ronnie Ga https://ww   | 1-3-2021                                     |            |
| Lambda | hCoV-19/P VOI_Lambi betacoron: EPI_ISL_11 | 17-1-2021  | South Ame | Peru        | Lima               | South Ame  | Peru        | Lima genome         | 29901              | Human | unknown | unknown | C.37      | GR      | Laboratorik Laboratorik Ronnie Ga https://ww   | 1-3-2021                                     |            |
| Lambda | hCoV-19/P VOI_Lambi betacoron: EPI_ISL_11 | 17-1-2021  | South Ame | Peru        | Lima               | South Ame  | Peru        | Lima genome         | 29887              | Human | unknown | unknown | C.37      | GR      | Laboratorik Laboratorik Ronnie Ga https://ww   | 1-3-2021                                     |            |
| Lambda | hCoV-19/P VOI_Lambi betacoron: EPI_ISL_11 | 17-1-2021  | South Ame | Peru        | Lima               | South Ame  | Peru        | Lima genome         | 29901              | Human | unknown | unknown | C.37      | GR      | Laboratorik Laboratorik Ronnie Ga https://ww   | 1-3-2021                                     |            |
| Lambda | hCoV-19/P VOI_Lambi betacoron: EPI_ISL_11 | 17-1-2021  | South Ame | Peru        | Lima               | South Ame  | Peru        | Lima genome         | 29874              | Human | unknown | unknown | C.37      | GR      | Laboratorik Laboratorik Ronnie Ga https://ww   | 1-3-2021                                     |            |
| Lambda | hCoV-19/P VOI_Lambi betacoron: EPI_ISL_11 | 17-1-2021  | South Ame | Peru        | Lima               | South Ame  | Peru        | Lima genome         | 29901              | Human | unknown | unknown | C.37      | GR      | Laboratorik Laboratorik Ronnie Ga https://ww   | 1-3-2021                                     |            |
| Lambda | hCoV-19/P VOI_Lambi betacoron: EPI_ISL_11 | 18-1-2021  | South Ame | Peru        | Callao             | South Ame  | Peru        | Callao genome       | 29888              | Human | unknown | unknown | C.37      | GR      | Laboratorik Laboratorik Ronnie Ga https://ww   | 1-3-2021                                     |            |



**Table 2:** Genomic region wise mutational count of the omicron isolates by taking reference sequence NC\_045512.2

| Genomic region | Mutational count | Annotation                   |
|----------------|------------------|------------------------------|
| 5'UTR          | 309              | 5' Untranslated region       |
| NSP1           | 5                |                              |
| NSP2           | 31               |                              |
| NSP3           | 1572             |                              |
| NSP4           | 325              |                              |
| NSP5           | 317              |                              |
| NSP6           | 595              |                              |
| NSP7           | 0                |                              |
| NSP8           | 2                |                              |
| NSP9           | 9                |                              |
| NSP10          | 301              |                              |
| NSP11          | 0                |                              |
| NSP12a         | 0                |                              |
| NSP12b         | 632              |                              |
| NSP13          | 14               |                              |
| NSP14          | 319              |                              |
| NSP15          | 6                |                              |
| NSP16          | 14               | RNA dependent RNA polymerase |
| S              | 10658            | Spike                        |
| ORF3a          | 313              | ORF3a protein                |
| E              | 296              | Envelope                     |
| M              | 850              | Membrane                     |
| ORF6           | 303              | ORF6 protein                 |
| ORF7a          | 2                | ORF7a protein                |
| ORF7b          | 311              | ORF7b protein                |
| ORF8           | 4                | ORF8 protein                 |
| N              | 823              | Nucleocapsid protein         |
| ORF10          | 1                | ORF10 protein                |
| 3'UTR          | 249              | 3' Untranslated region       |

**Table 3:** Top mutations (>185 count) in omicron variant as compared to the reference sequence NC\_045512.2

| annotator    | protein | variant | varclass    | Count | refpos | refvar   | qvar | qpos  | qlength |
|--------------|---------|---------|-------------|-------|--------|----------|------|-------|---------|
| Spike        | S       | A67     | deletion_fi | 575   | 21762  | C        | .    | 21483 | 29387   |
| Predicted Ꞥ  | NSP3    | A1892T  | SNP         | 302   | 8393   | G        | A    | 8124  | 29387   |
| Transmem     | NSP6    | I189V   | SNP         | 302   | 11537  | A        | G    | 11259 | 29387   |
| RNA-deper    | NSP12b  | P314L   | SNP         | 302   | 14408  | C        | T    | 14130 | 29387   |
| Spike        | S       | T547K   | SNP         | 302   | 23202  | C        | A    | 22915 | 29387   |
| Spike        | S       | D614G   | SNP         | 302   | 23403  | A        | G    | 23116 | 29387   |
| Spike        | S       | H655Y   | SNP         | 302   | 23525  | C        | T    | 23238 | 29387   |
| ORF6 prot    | ORF6    | M19M    | SNP_silent  | 302   | 27259  | A        | C    | 26972 | 29387   |
| Predicted Ꞥ  | NSP3    | K38R    | SNP         | 301   | 2832   | A        | G    | 2566  | 29387   |
| Spike        | S       | N679K   | SNP         | 301   | 23599  | T        | G    | 23312 | 29387   |
| Transmem     | NSP4    | T492I   | SNP         | 301   | 10029  | C        | T    | 9760  | 29378   |
| Nucleocap    | N       | RG203K* | SNP         | 301   | 28881  | GGG      | AAT  | 28806 | 29693   |
| Growth-fac   | NSP10   | V57V    | SNP_silent  | 300   | 13195  | T        | C    | 12917 | 29387   |
| Spike        | S       | P681H   | SNP         | 300   | 23604  | C        | A    | 23317 | 29387   |
| Spike        | S       | D796Y   | SNP         | 300   | 23948  | G        | T    | 23661 | 29387   |
| Spike        | S       | N856K   | SNP         | 300   | 24130  | C        | A    | 23843 | 29387   |
| Spike        | S       | Q954H   | SNP         | 300   | 24424  | A        | T    | 24137 | 29387   |
| Nucleocap    | N       | RG203KR | SNP         | 300   | 28881  | GGG      | AAC  | 28594 | 29387   |
| RNA-deper    | NSP12b  | N591N   | SNP_silent  | 298   | 15240  | C        | T    | 14962 | 29387   |
| Spike        | S       | T95I    | SNP         | 298   | 21846  | C        | T    | 21562 | 29387   |
| Predicted Ꞥ  | NSP3    | F106F   | SNP_silent  | 297   | 3037   | C        | T    | 2771  | 29387   |
| Spike        | S       | G339D   | SNP         | 297   | 22578  | G        | A    | 22291 | 29387   |
| ORF3a pro    | ORF3a   | T64T    | SNP_silent  | 297   | 25584  | C        | T    | 25297 | 29387   |
| NA           | 5'UTR   | 241     | extragenic  | 297   | 241    | C        | T    | 187   | 29693   |
| 3C-like pro  | NSP5    | P132H   | SNP         | 296   | 10449  | C        | A    | 10180 | 29387   |
| 3'-to-5' exc | NSP14   | I42V    | SNP         | 296   | 18163  | A        | G    | 17885 | 29387   |
| Envelope     | E       | T9I     | SNP         | 296   | 26270  | C        | T    | 25983 | 29387   |
| ORF7b pro    | ORF7b   | L17L    | SNP_silent  | 296   | 27807  | C        | T    | 27520 | 29387   |
| Spike        | S       | N969K   | SNP         | 294   | 24469  | T        | A    | 24182 | 29387   |
| Predicted Ꞥ  | NSP3    | A889A   | SNP_silent  | 293   | 5386   | T        | G    | 5120  | 29387   |
| Spike        | S       | L981F   | SNP         | 292   | 24503  | C        | T    | 24216 | 29387   |
| Spike        | S       | D1146D  | SNP_silent  | 292   | 25000  | C        | T    | 24713 | 29387   |
| Membran      | M       | A63T    | SNP         | 289   | 26709  | G        | A    | 26422 | 29387   |
| Predicted Ꞥ  | NSP3    | S1265   | deletion    | 288   | 6513   | GTT      | .    | 6246  | 29387   |
| Transmem     | NSP6    | L105    | deletion    | 287   | 11286  | TGTCTGGT | .    | 11016 | 29387   |

|           |       |       |             |     |       |          |     |       |       |
|-----------|-------|-------|-------------|-----|-------|----------|-----|-------|-------|
| Spike     | S     | I68   | deletion_fi | 287 | 21767 | CATG     | .   | 21486 | 29387 |
| Spike     | S     | E484A | SNP         | 284 | 23013 | A        | C   | 22726 | 29387 |
| Spike     | S     | S477N | SNP         | 283 | 22992 | G        | A   | 22705 | 29387 |
| Spike     | S     | T478K | SNP         | 283 | 22995 | C        | A   | 22708 | 29387 |
| Spike     | S     | Q493R | SNP         | 282 | 23040 | A        | G   | 22753 | 29387 |
| Spike     | S     | Q498R | SNP         | 281 | 23055 | A        | G   | 22768 | 29387 |
| Spike     | S     | N501Y | SNP         | 281 | 23063 | A        | T   | 22776 | 29387 |
| Spike     | S     | G496S | SNP         | 280 | 23048 | G        | A   | 22761 | 29387 |
| Spike     | S     | Y505H | SNP         | 277 | 23075 | T        | C   | 22788 | 29387 |
| Membrane  | M     | D3G   | SNP         | 275 | 26530 | A        | G   | 26243 | 29387 |
| Membrane  | M     | Q19E  | SNP         | 272 | 26577 | C        | G   | 26290 | 29387 |
| Spike     | S     | S371L | SNP         | 270 | 22673 | TC       | CT  | 22386 | 29387 |
| Spike     | S     | S373P | SNP         | 270 | 22679 | T        | C   | 22392 | 29387 |
| Spike     | S     | G142  | deletion    | 260 | 21987 | GTGTTTAT | .   | 21702 | 29387 |
| Spike     | S     | S375F | SNP         | 260 | 22686 | C        | T   | 22399 | 29387 |
| ORF7b pro | ORF7b | E3*   | SNP_stop    | 253 | 27762 | G        | T   | 27687 | 29752 |
| Spike     | S     | I210  | insertion_f | 243 | 22193 | .        | T   | 21901 | 29387 |
| Spike     | S     | R214  | insertion_f | 243 | 22203 | .        | A   | 21916 | 29387 |
| Spike     | S     | R214R | SNP_silent  | 243 | 22204 | T        | A   | 21917 | 29387 |
| Nucleocap | N     | E31   | deletion    | 243 | 28362 | GAGAACG  | (.  | 28074 | 29378 |
| Spike     | S     | L212* | SNP_stop    | 243 | 22197 | T        | G   | 22118 | 29749 |
| Spike     | S     | N211K | SNP         | 242 | 22195 | T        | G   | 21903 | 29387 |
| Spike     | S     | L212C | SNP         | 242 | 22197 | TA       | GC  | 21905 | 29387 |
| Spike     | S     | S214  | insertion   | 242 | 22201 | .        | AGC | 21910 | 29387 |
| Spike     | S     | V213  | insertion_f | 242 | 22202 | .        | A   | 21914 | 29387 |
| NA        | 3'UTR | 28271 | extragenic  | 242 | 28271 | A        | T   | 27984 | 29378 |
| Nucleocap | N     | P13L  | SNP         | 241 | 28311 | C        | T   | 28024 | 29378 |
| Spike     | S     | N764K | SNP         | 234 | 23854 | C        | A   | 23567 | 29387 |
| Spike     | S     | G446S | SNP         | 203 | 22898 | G        | A   | 22611 | 29387 |
| Spike     | S     | N440K | SNP         | 199 | 22882 | T        | G   | 22595 | 29387 |
| Spike     | S     | K417N | SNP         | 183 | 22813 | G        | T   | 22526 | 29387 |

Variants of SARS-CoV-2

- VOC Gamma
- VOC Beta
- VOI Mu
- VUM GH
- VOC Delta
- VOC Alpha
- VOI Lambda
- VOC Omicron

Phylogroups

- PG-I
- PG-II

bootstrap

- 0
- 0.25
- 0.5
- 0.75
- 1

Tree scale: 0.001

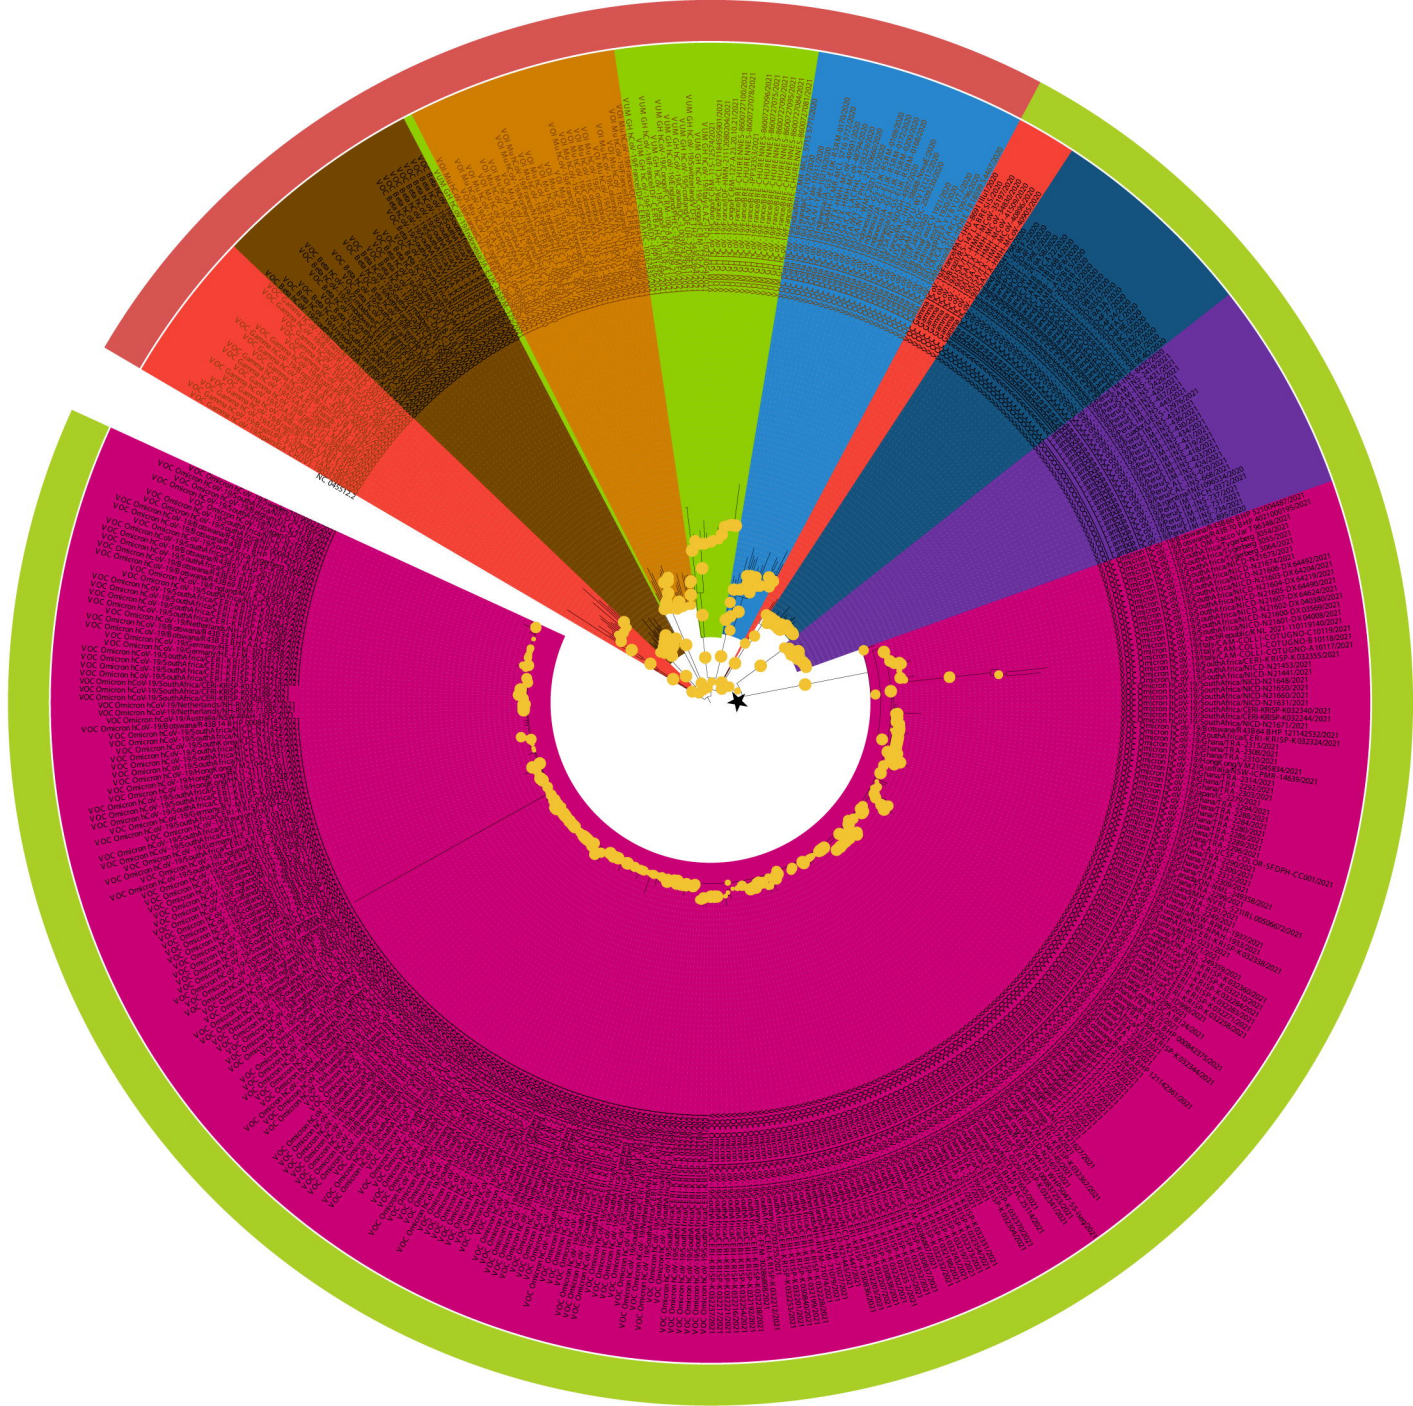

**Most mutated samples**

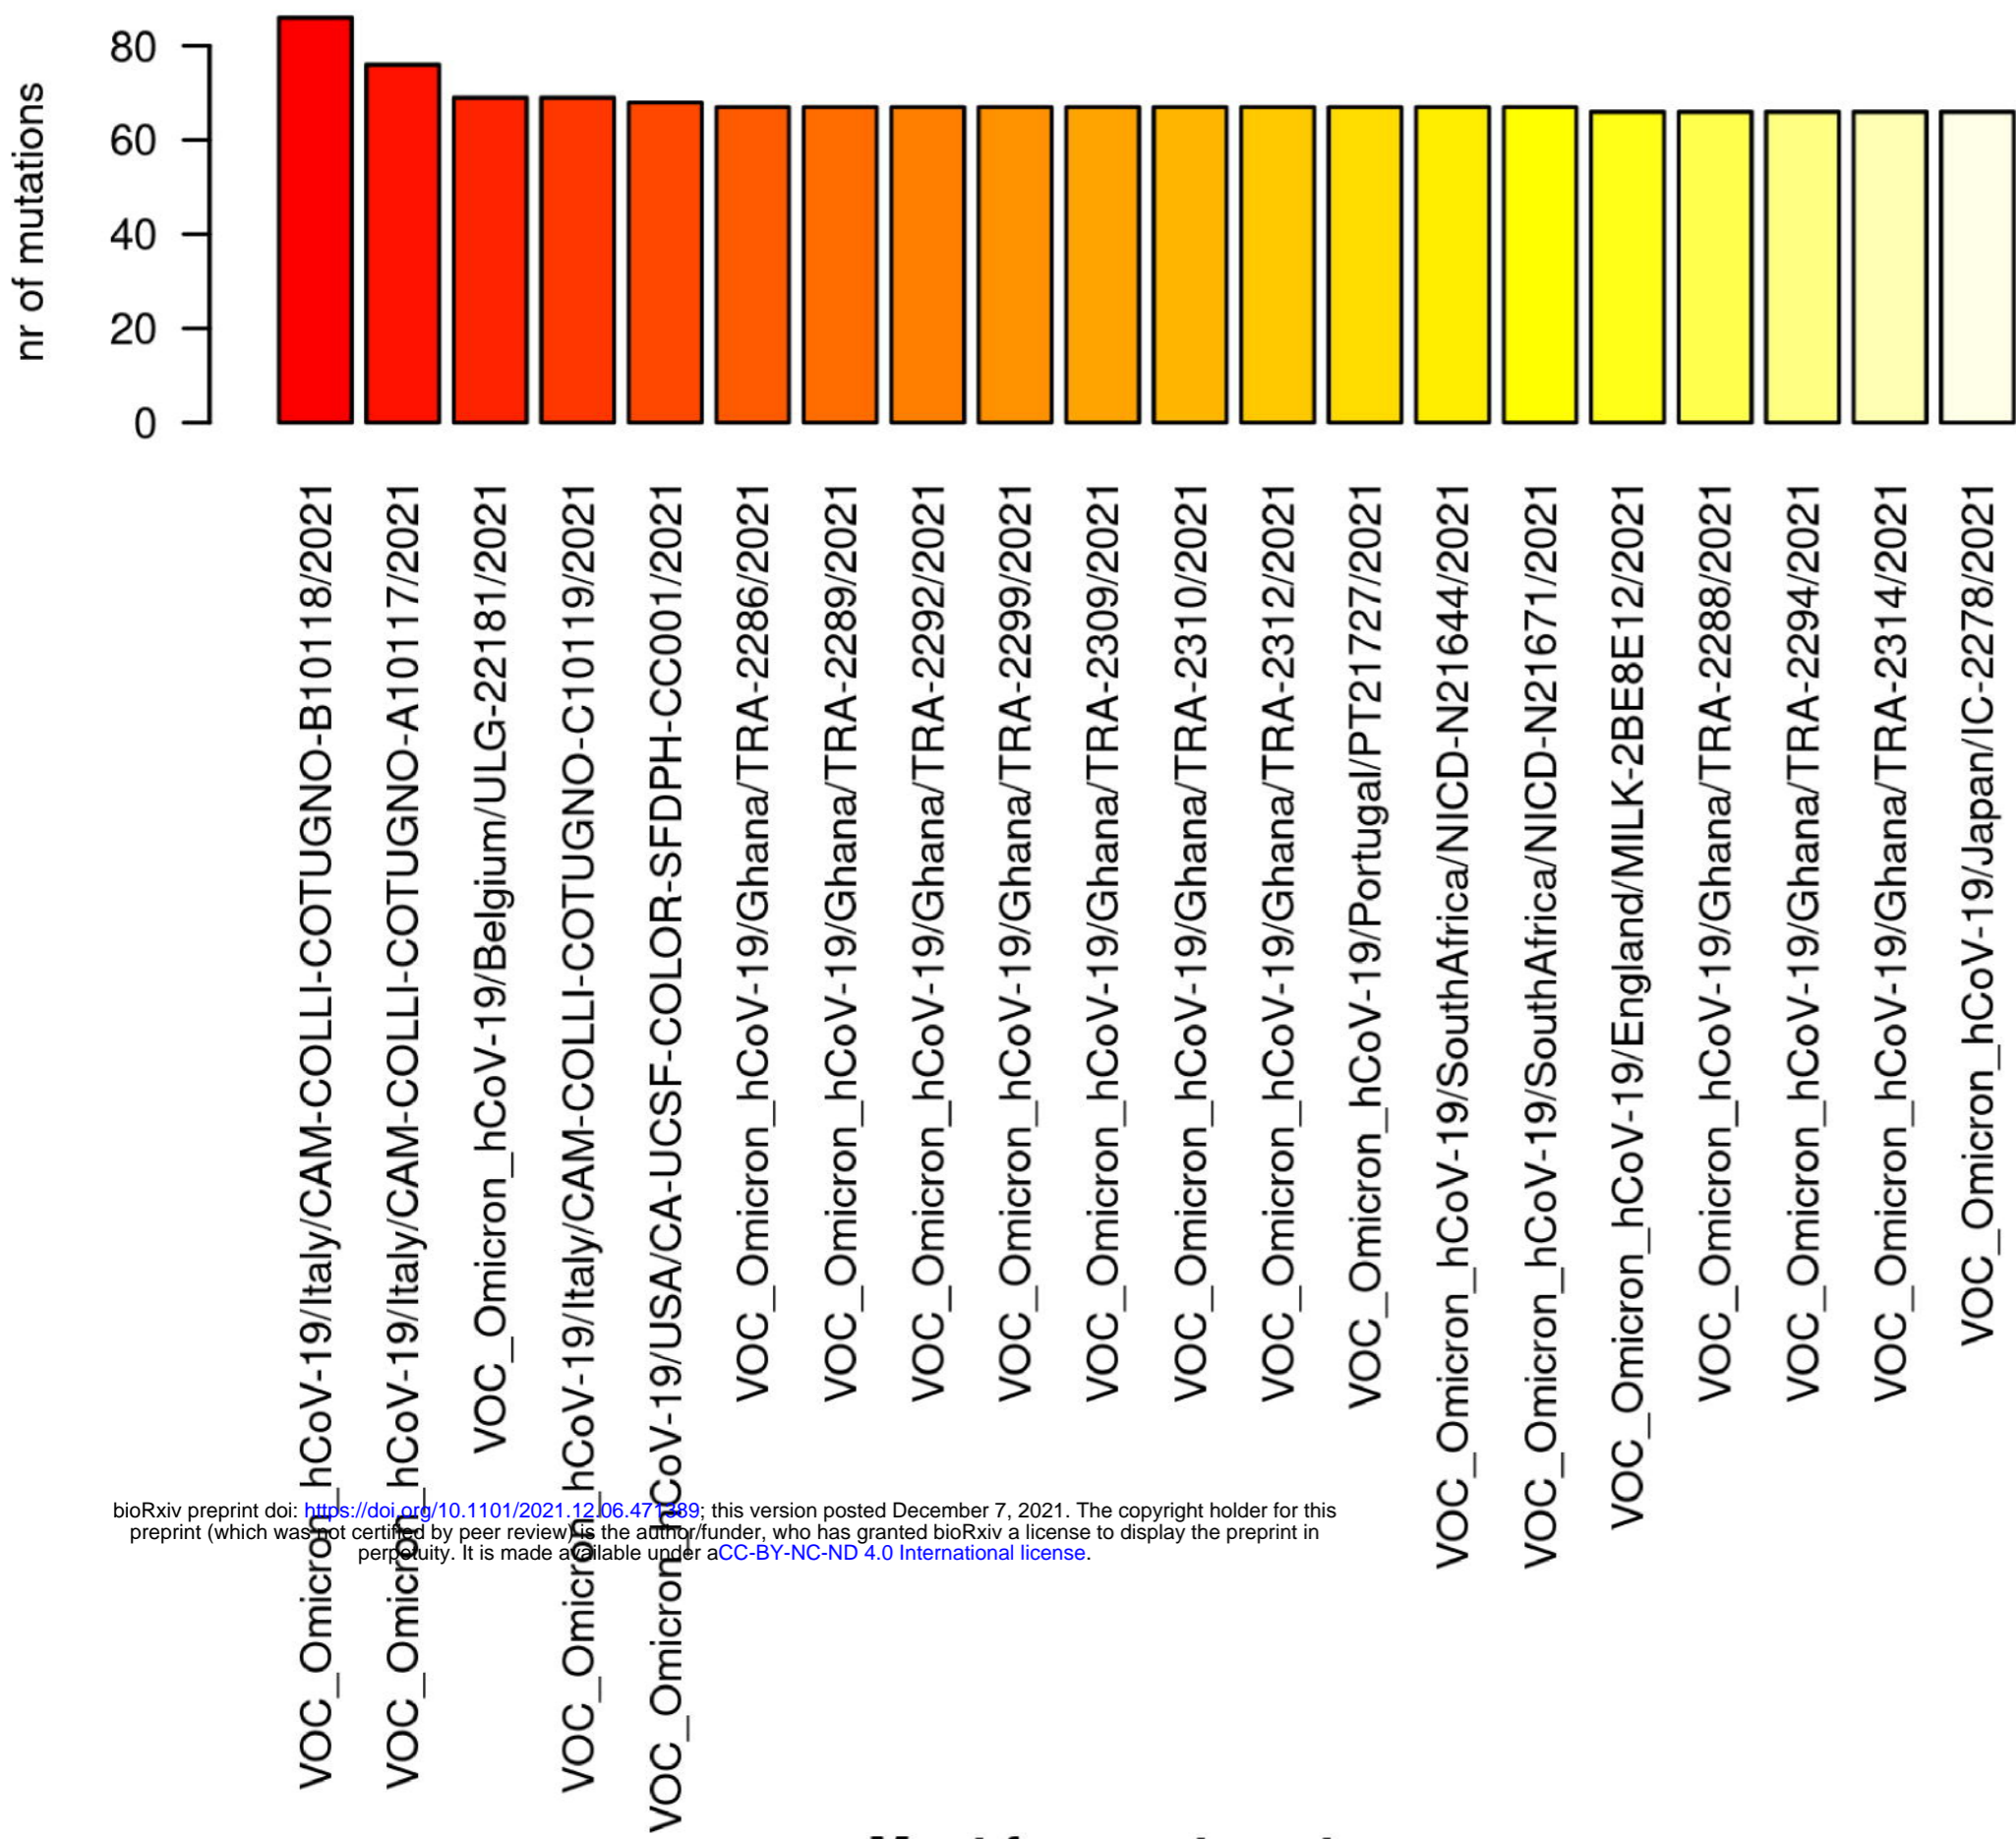

**Overall mutations per sample**

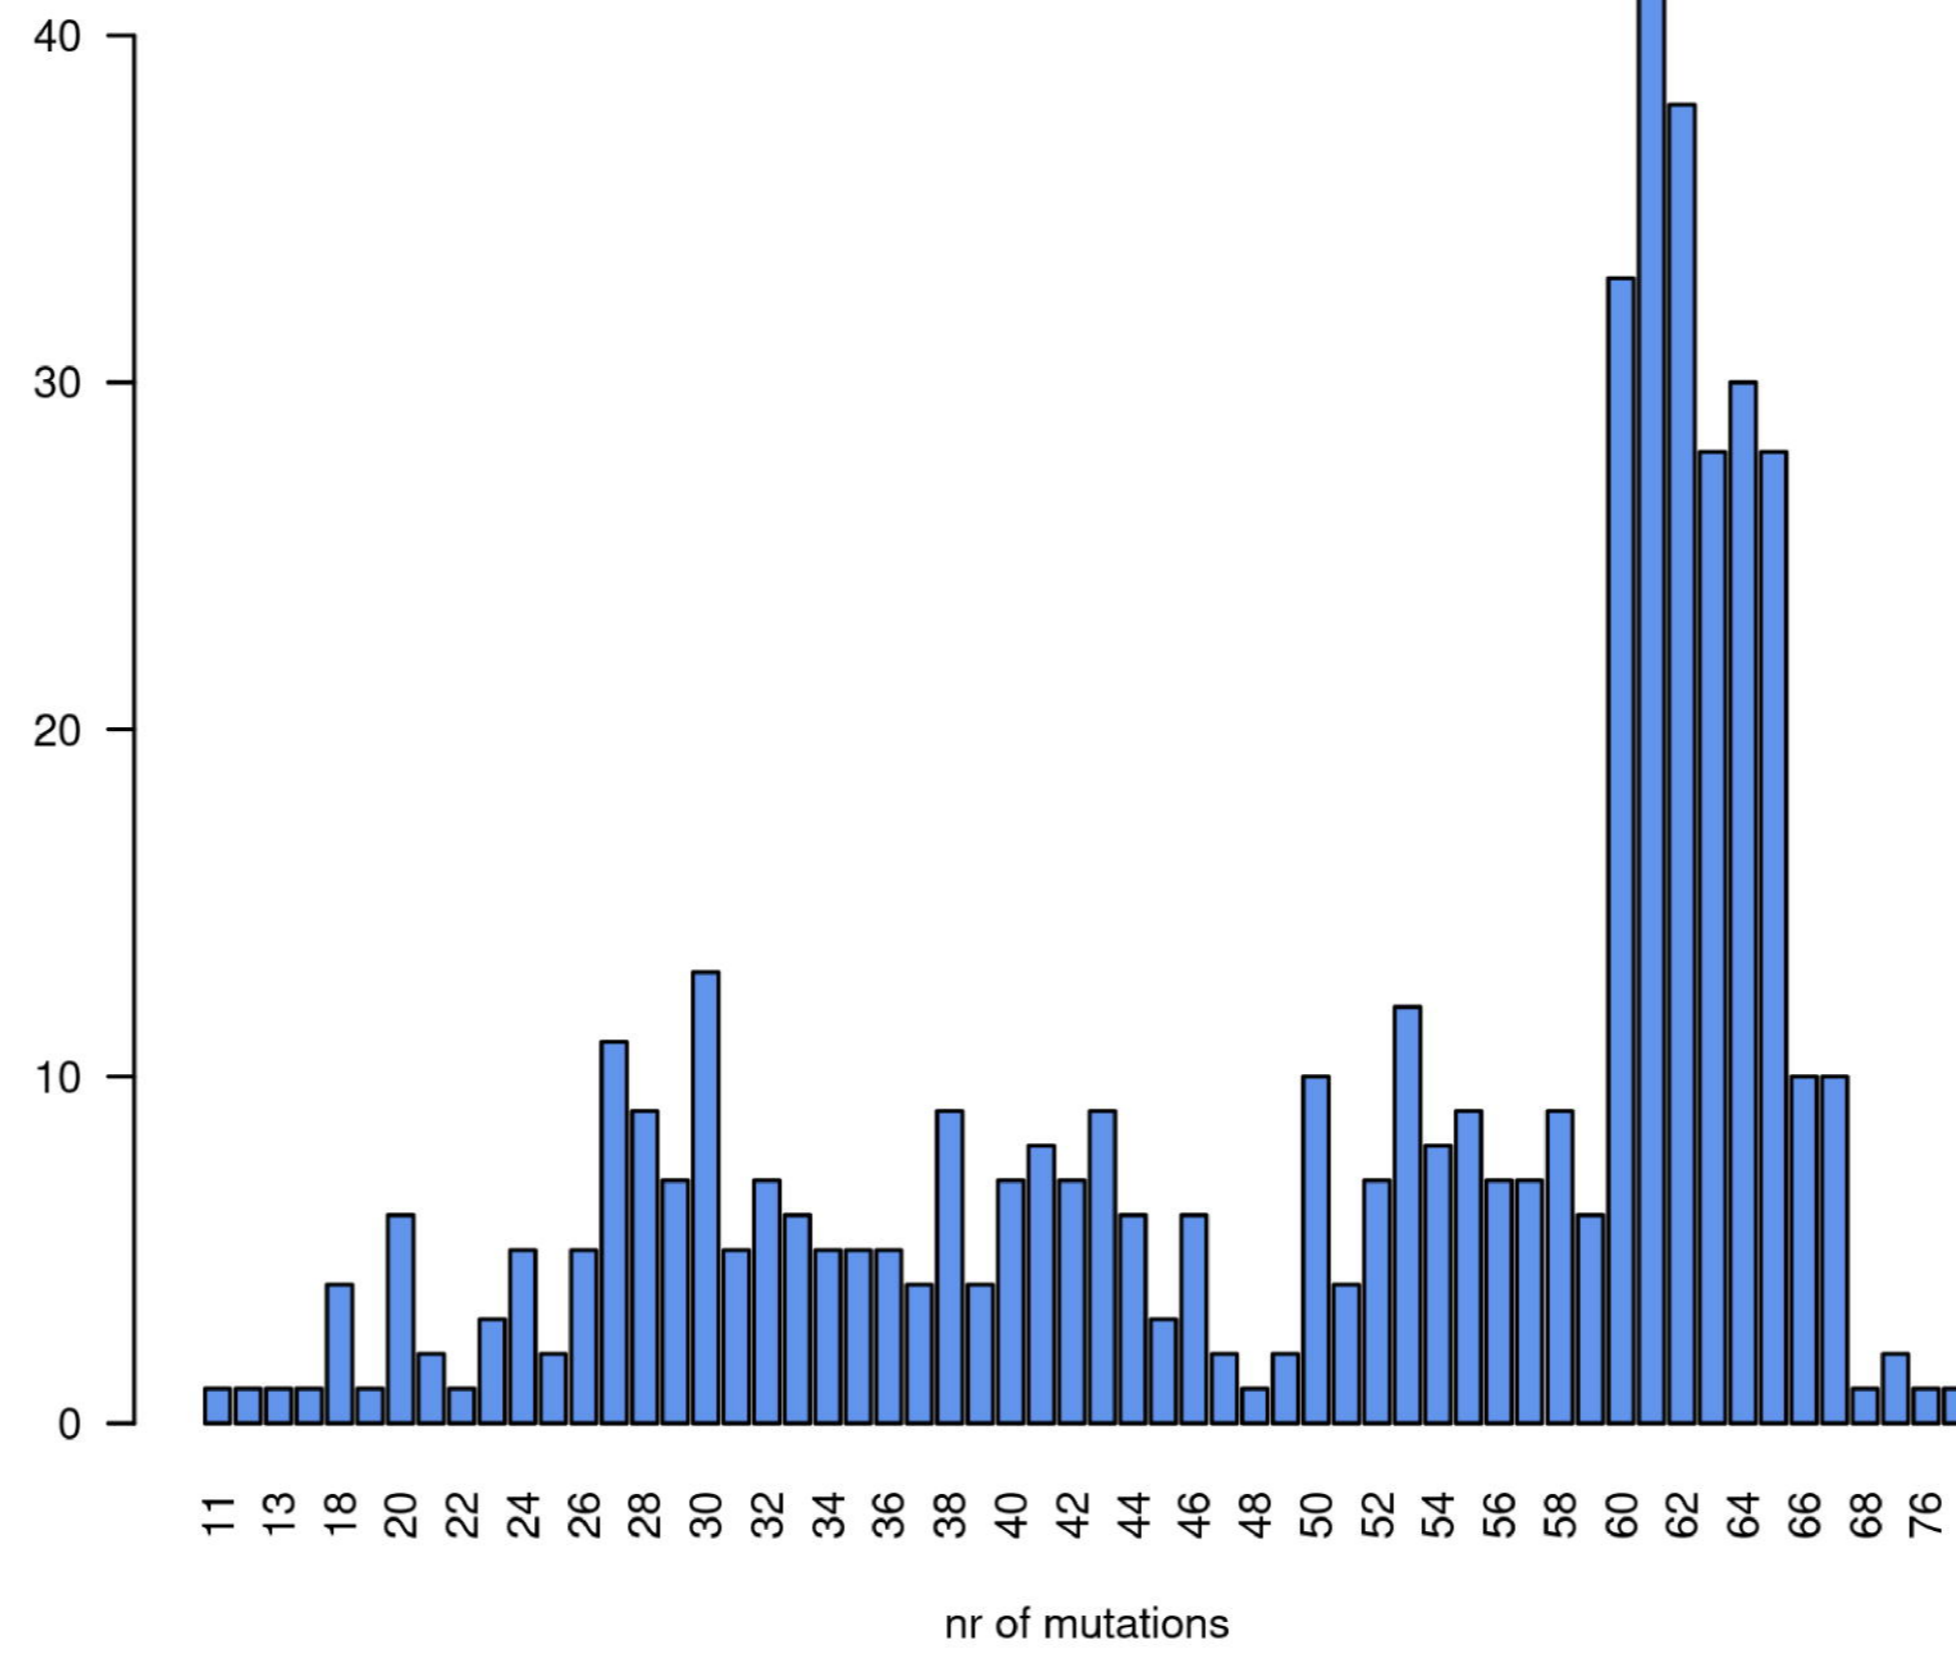

**Most frequent events per class**

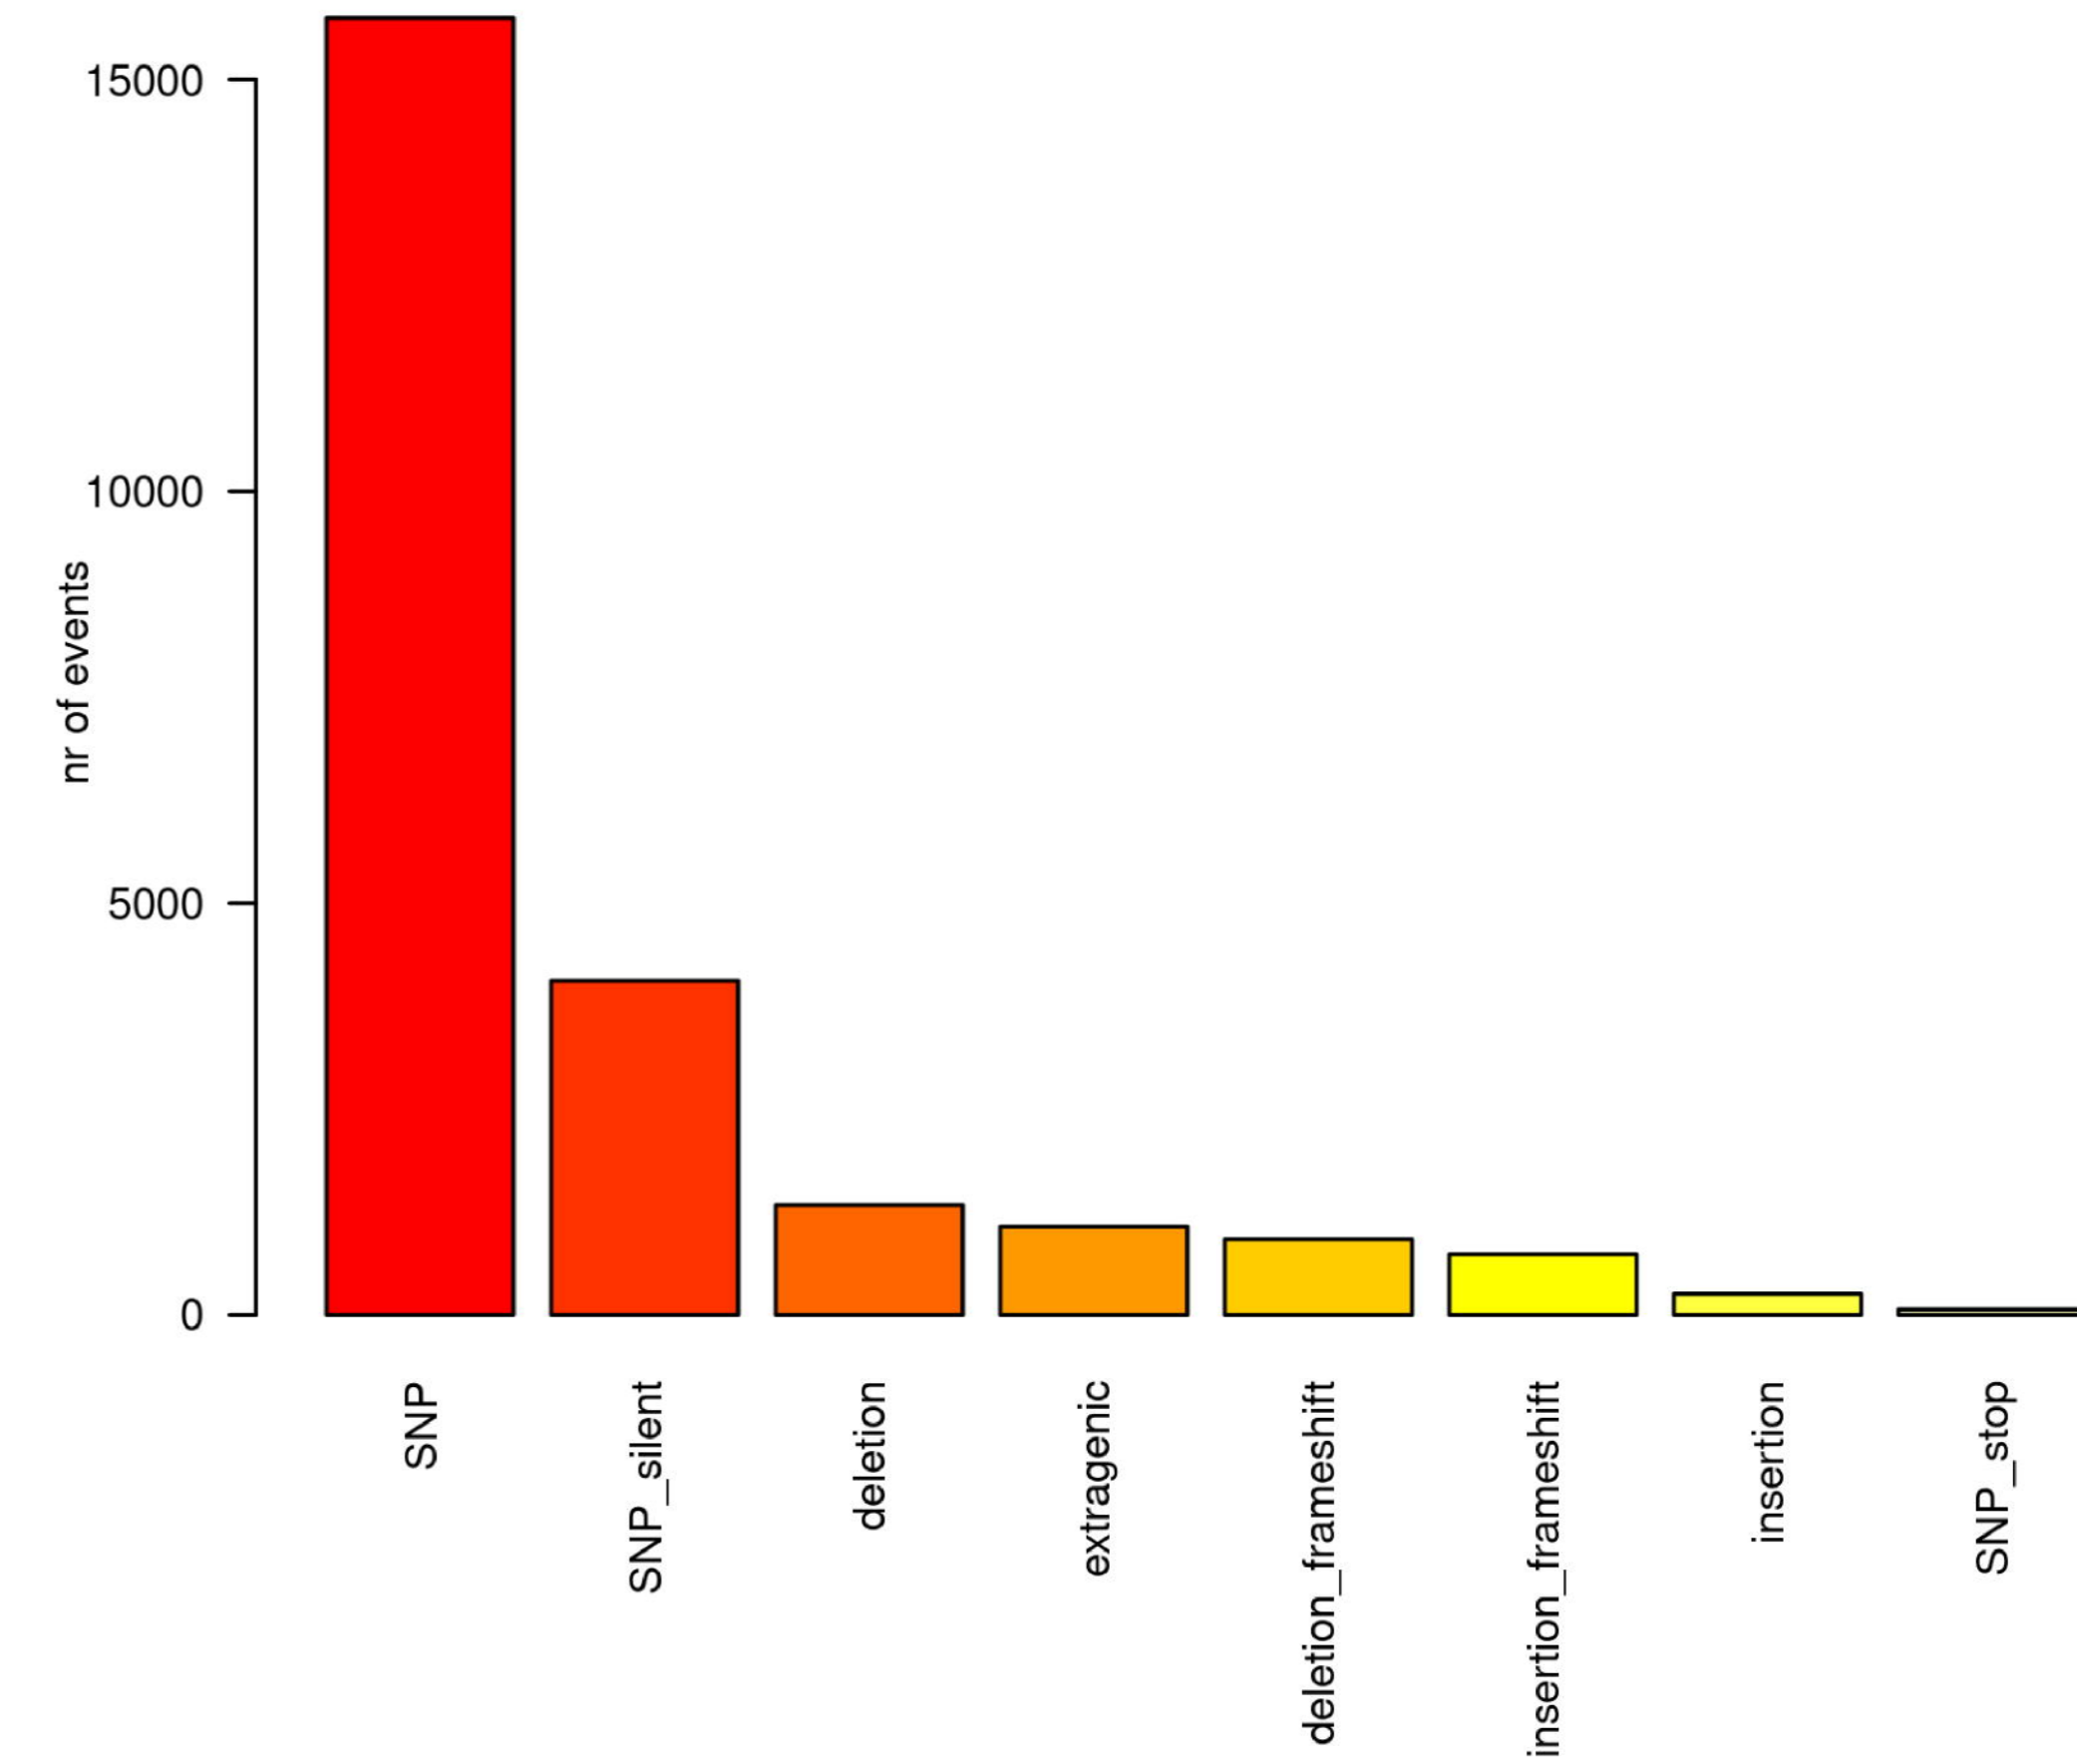

**Most frequent per type**

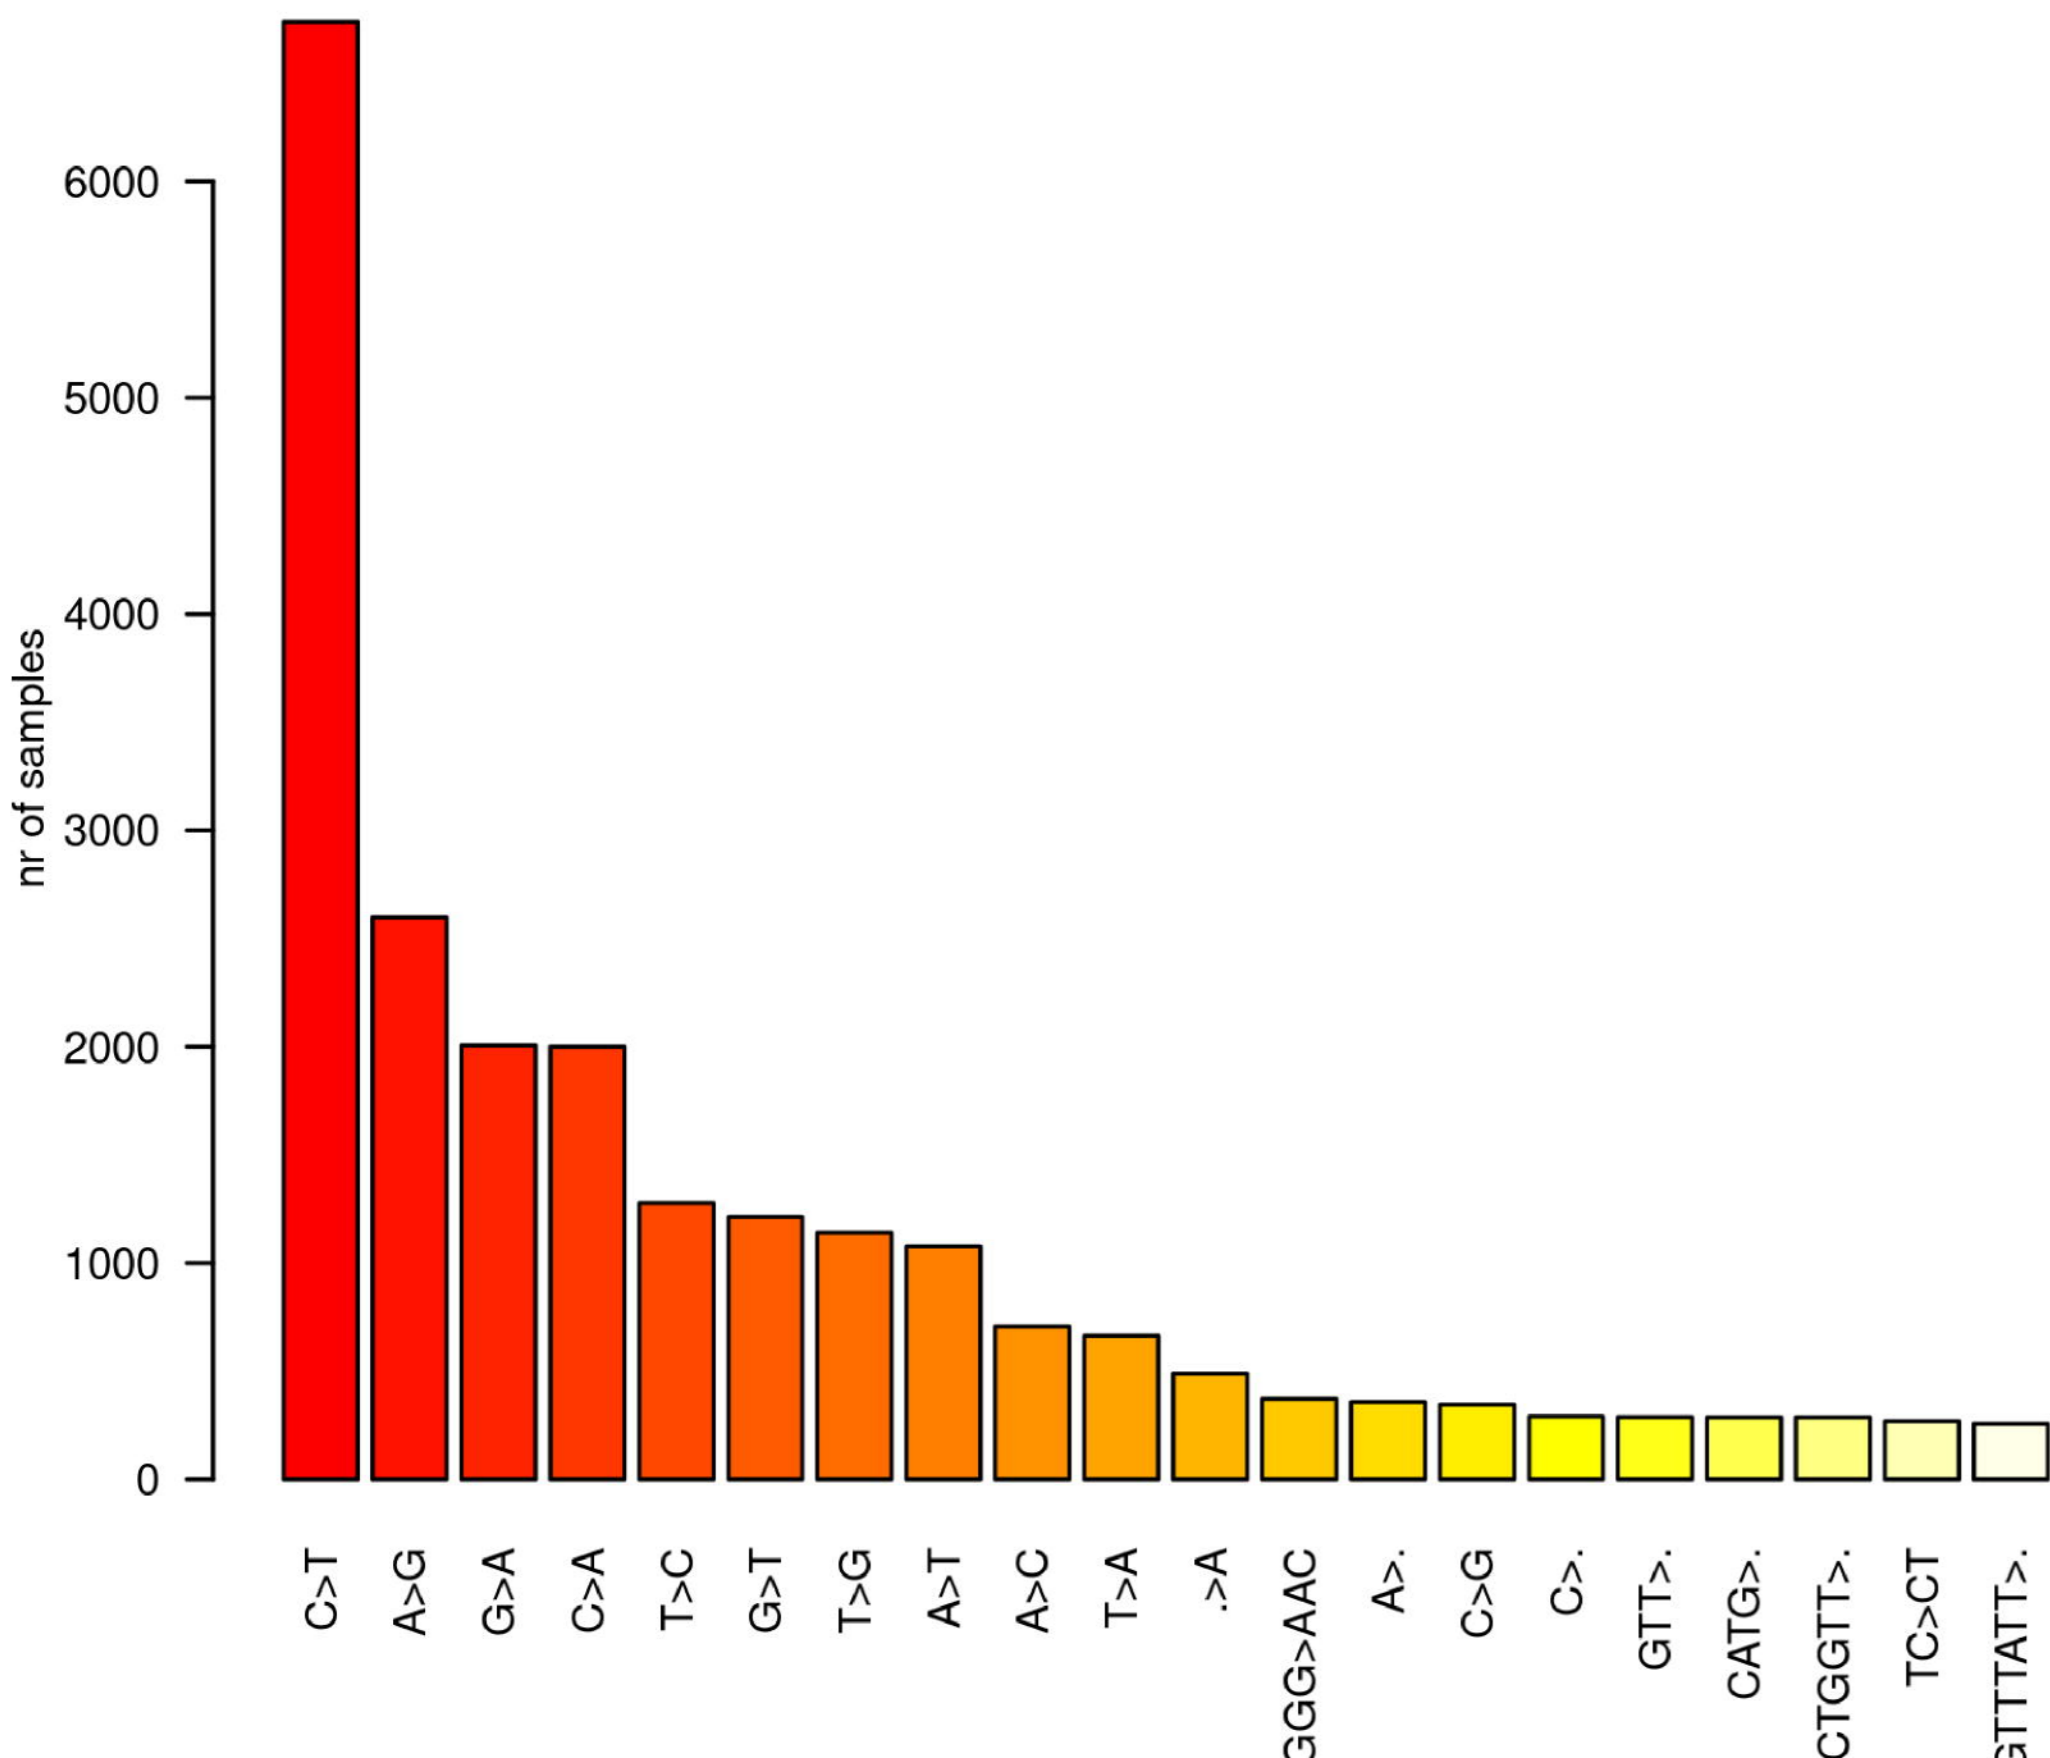

**Most frequent events (nucleotide)**

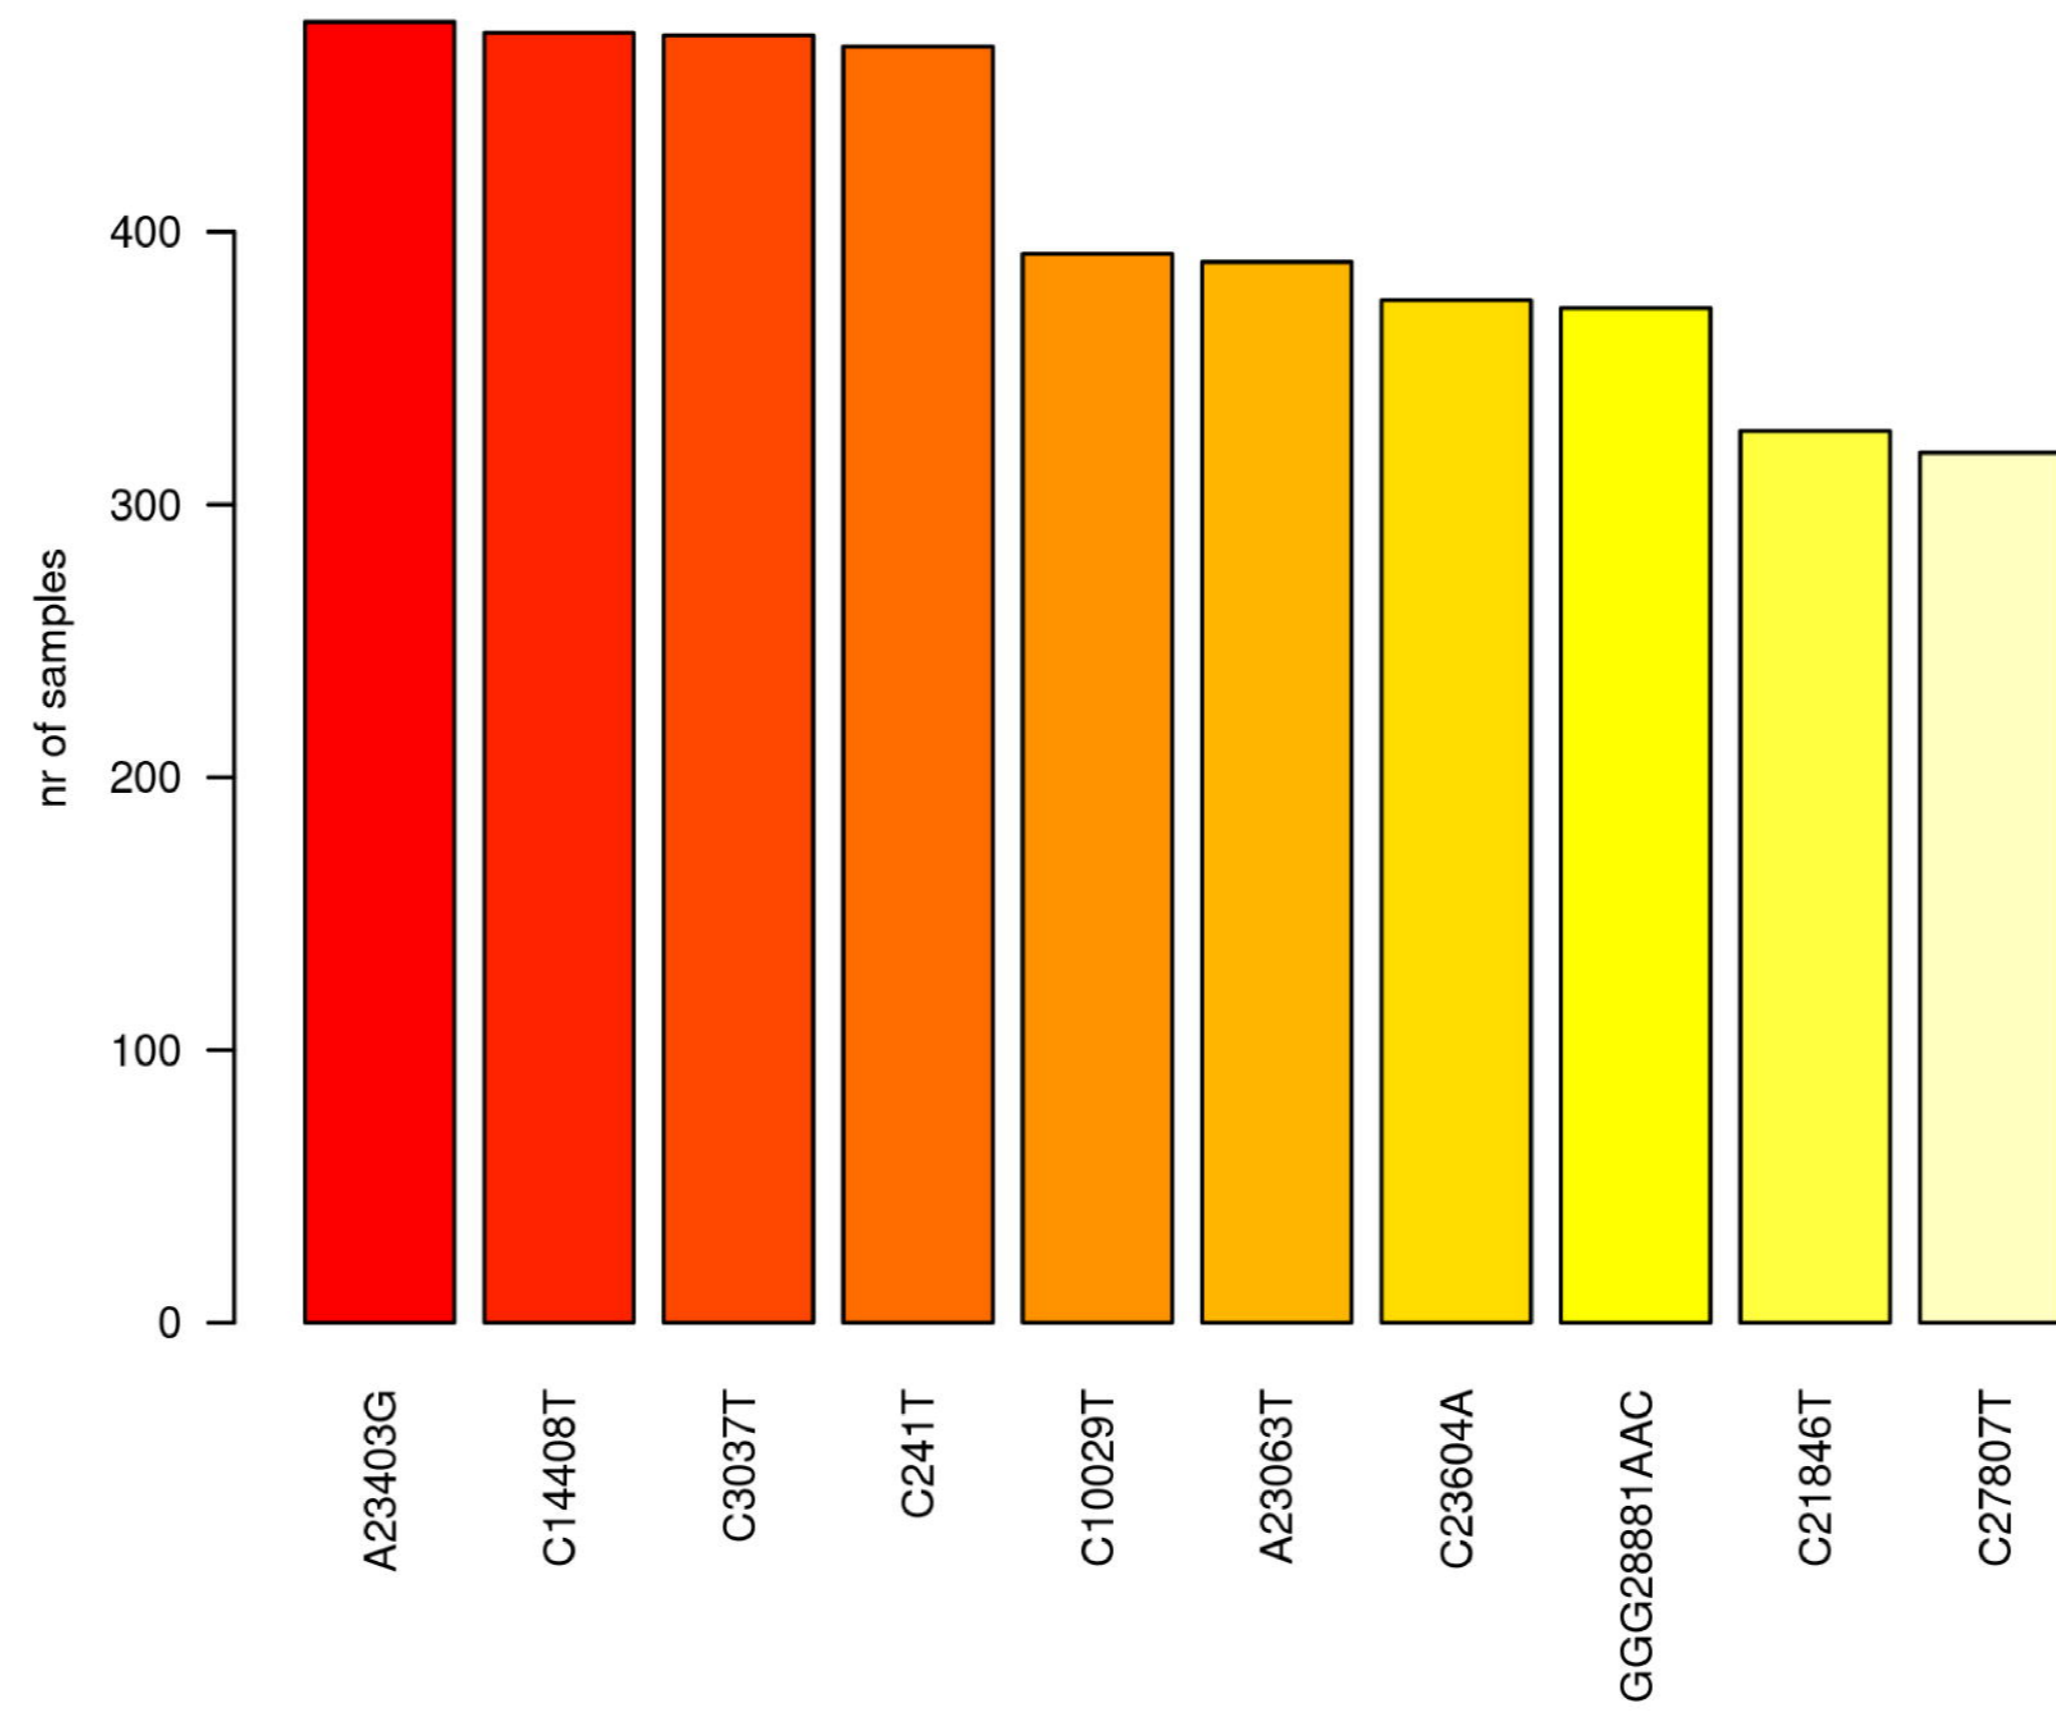

**Most frequent events (protein)**

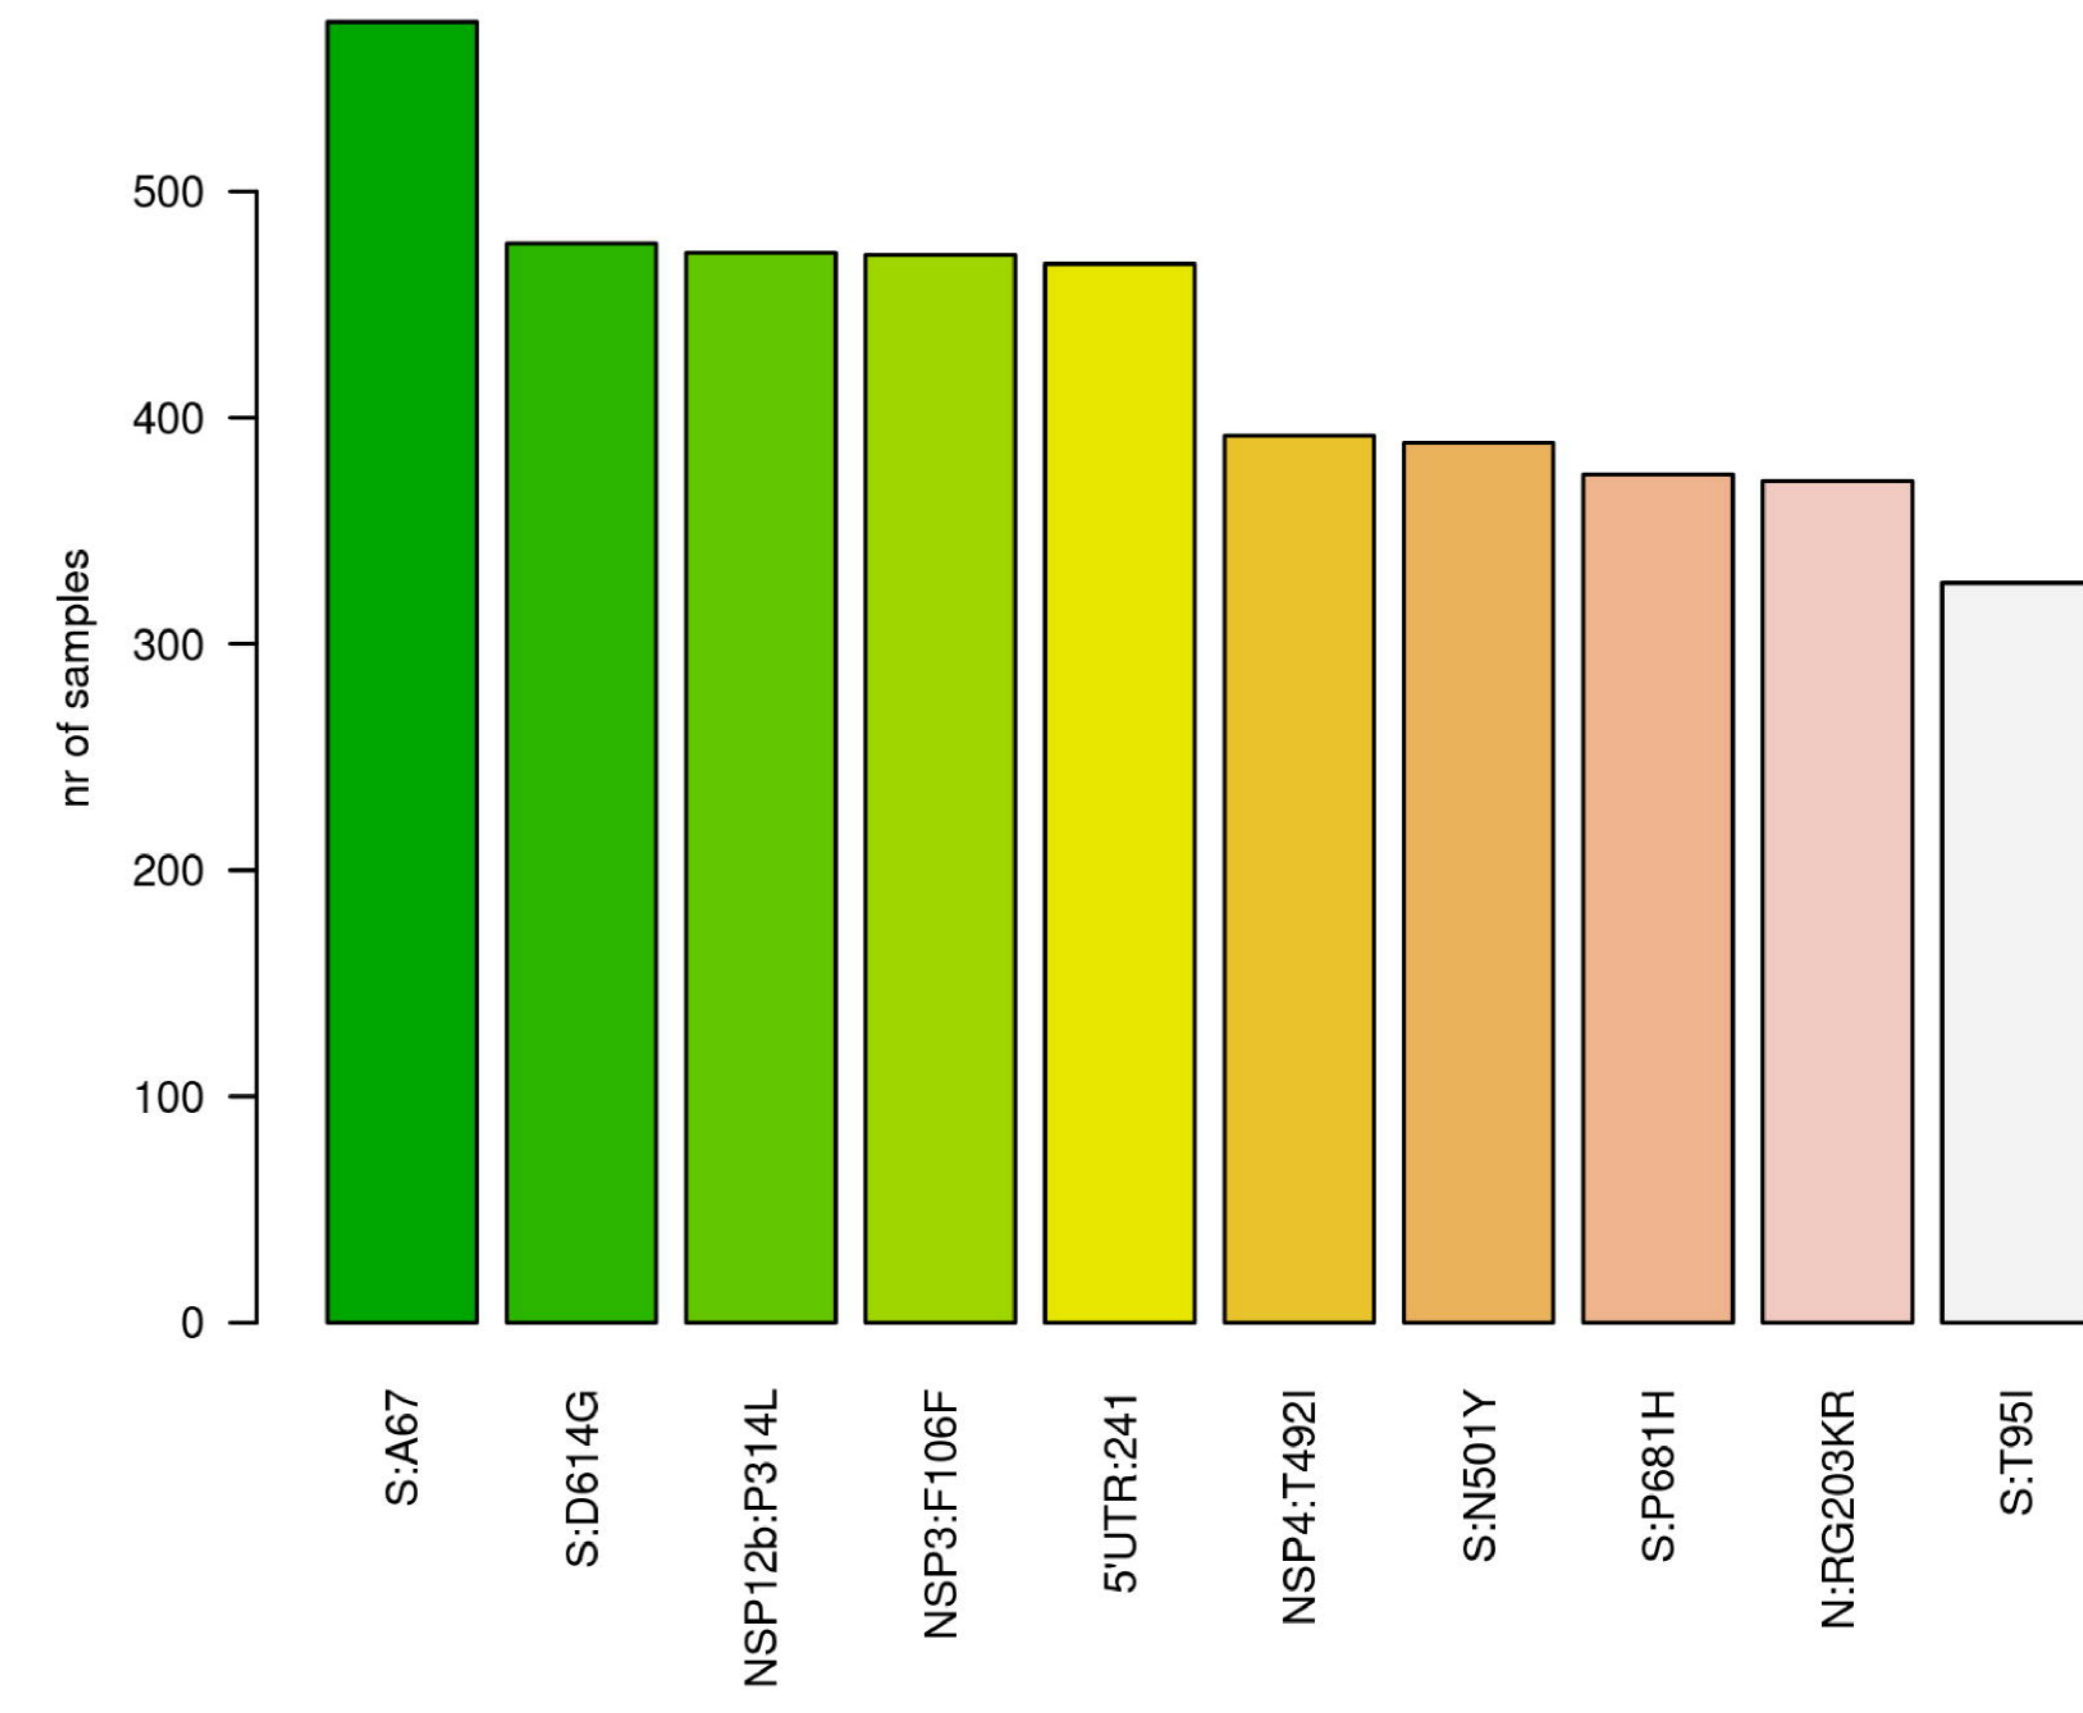

■ 5'UTR 241  
 □ 5'UTR 21

■ Insertion/Deletion

■ Synonymous SNP

■ Non-synonymous SNP

■ 3'UTR 28271  
 29705, 28273, 29844,  
 29750, 29867, 29742

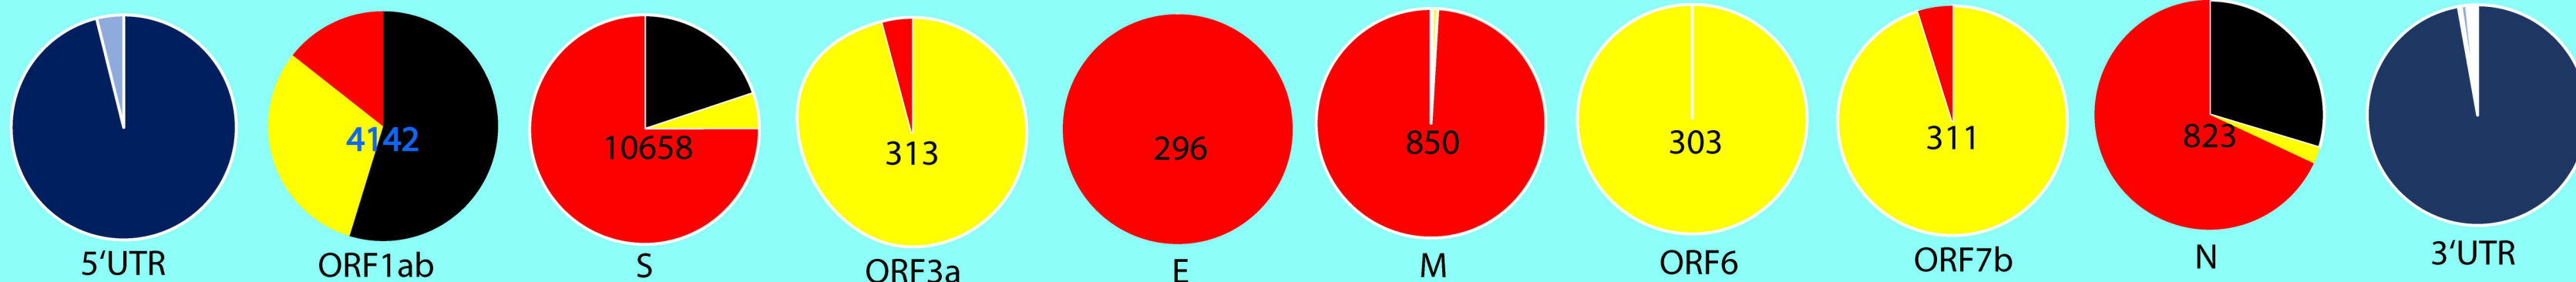

(A)

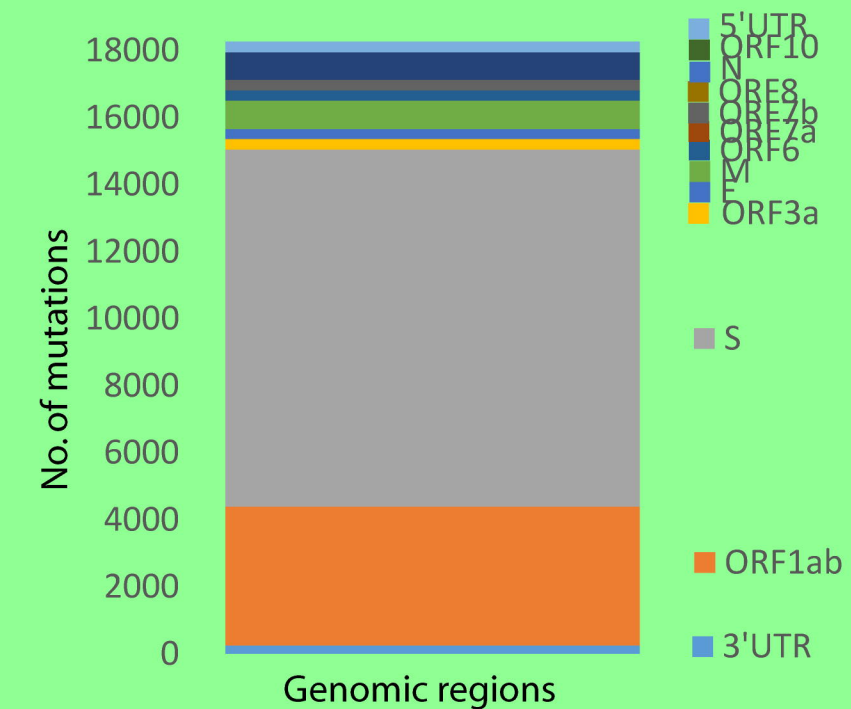

(B)

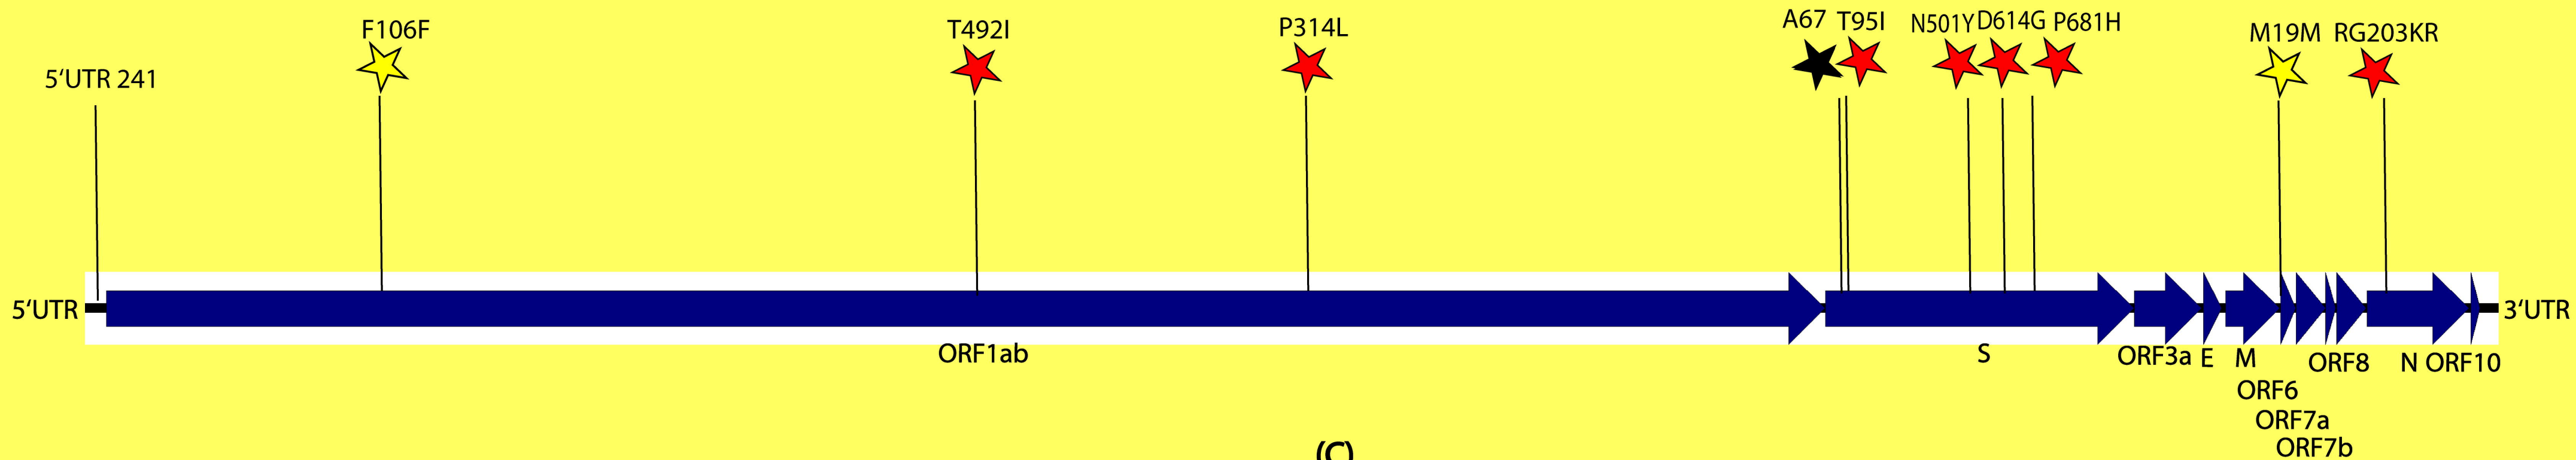

(C)
